# Supplementary material for: Furan-carboxamide derivatives as novel inhibitors of lethal H5N1 influenza A viruses
Source: Royal Society of Chemistry journal article supplement (doi:10.1039/c7ra00305f), 2017-01-01

## Supporting Information for

# Furan-Carboxamide Derivatives as Novel Inhibitors of Lethal H5N1 Influenza A Viruses

Yongshi Yu<sup>a</sup>, Jie Zheng<sup>a</sup>, Lei Cao<sup>b</sup>, Shu Li<sup>c</sup>, Xiwang Li<sup>a</sup>, Hai-Bing Zhou<sup>a</sup>, Xianjun Liu<sup>d</sup>, Shuwen Wu<sup>b\*</sup> and Chune Dong<sup>a\*</sup>

<sup>a</sup> Hubei Provincial Key Laboratory of Developmentally Originated Disease, Hubei Province Engineering and Technology Research Center for Fluorinated Pharmaceuticals, Wuhan University School of Pharmaceutical Sciences, Wuhan, 430071, China;

<sup>b</sup> State Key Laboratory of Virology, College of Life Sciences, Wuhan University, Wuhan 430072, China

<sup>c</sup> Medical Research Institute, Wuhan University, Wuhan 430071, China

<sup>d</sup> Suzhou Chukaipharma Tech, Building 14, 2358 Changan Road, Wujiang 215200, Suzhou, China

## <sup>1</sup>H NMR and <sup>13</sup>C NMR Spectra of final compounds (1a-1v)

### <sup>1</sup>H NMR of compound 1a

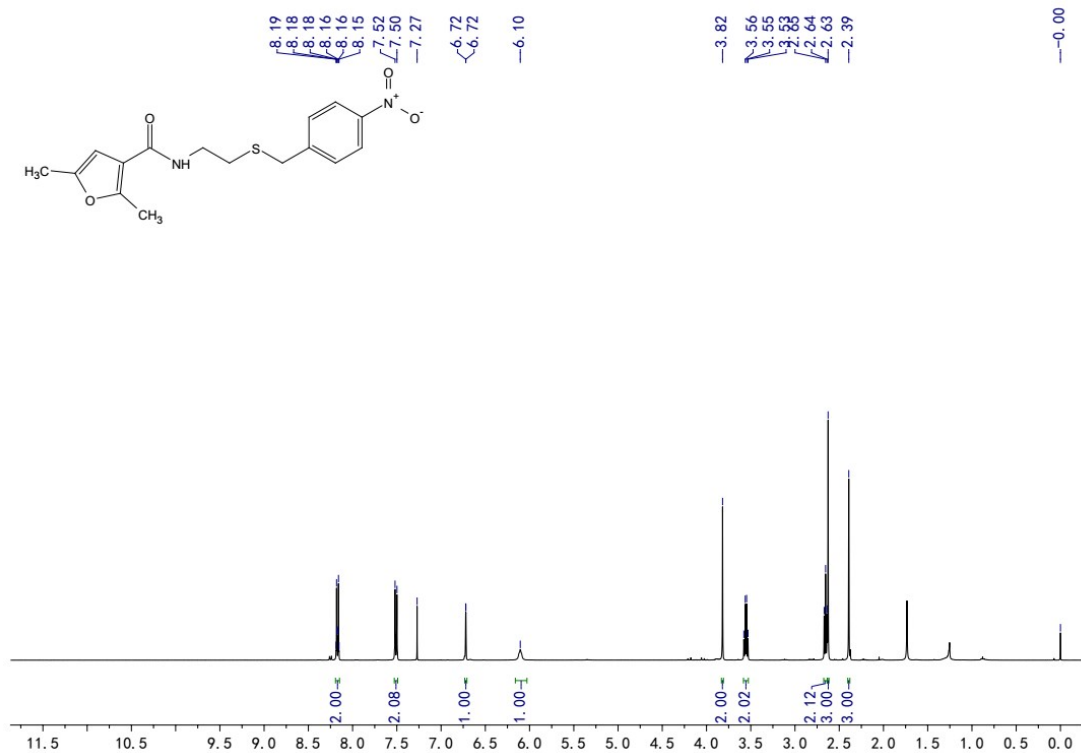

### <sup>13</sup>C NMR of compound 1a

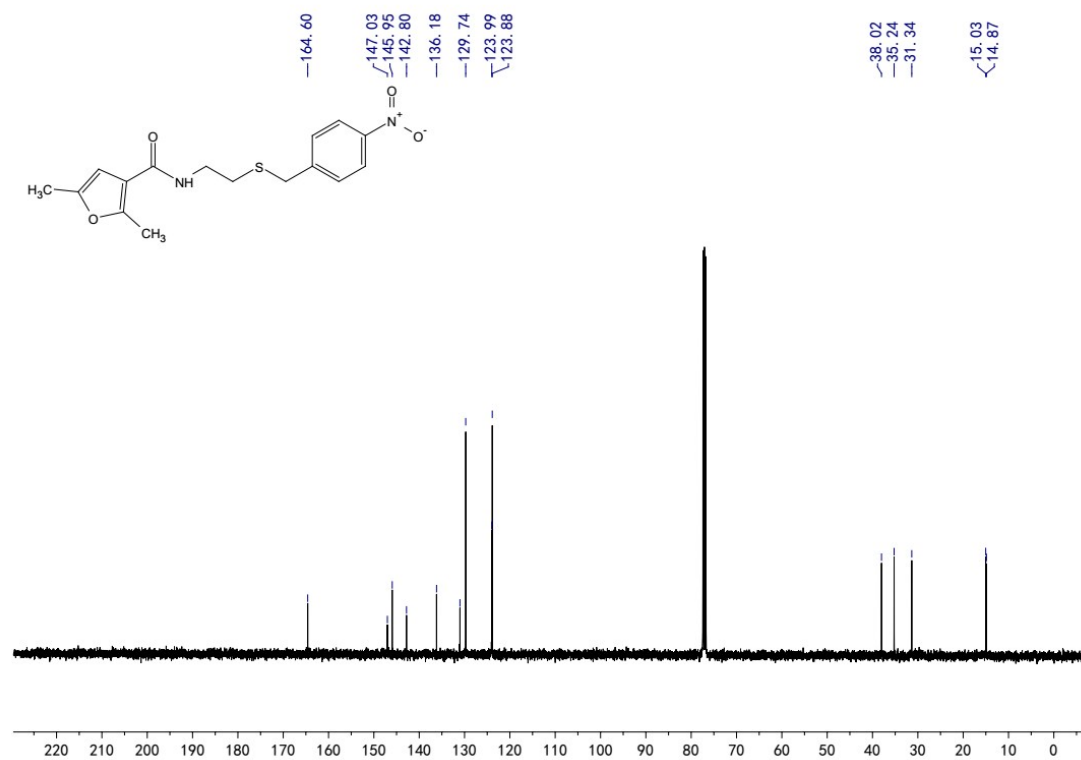

### <sup>1</sup>H NMR of compound **1b**

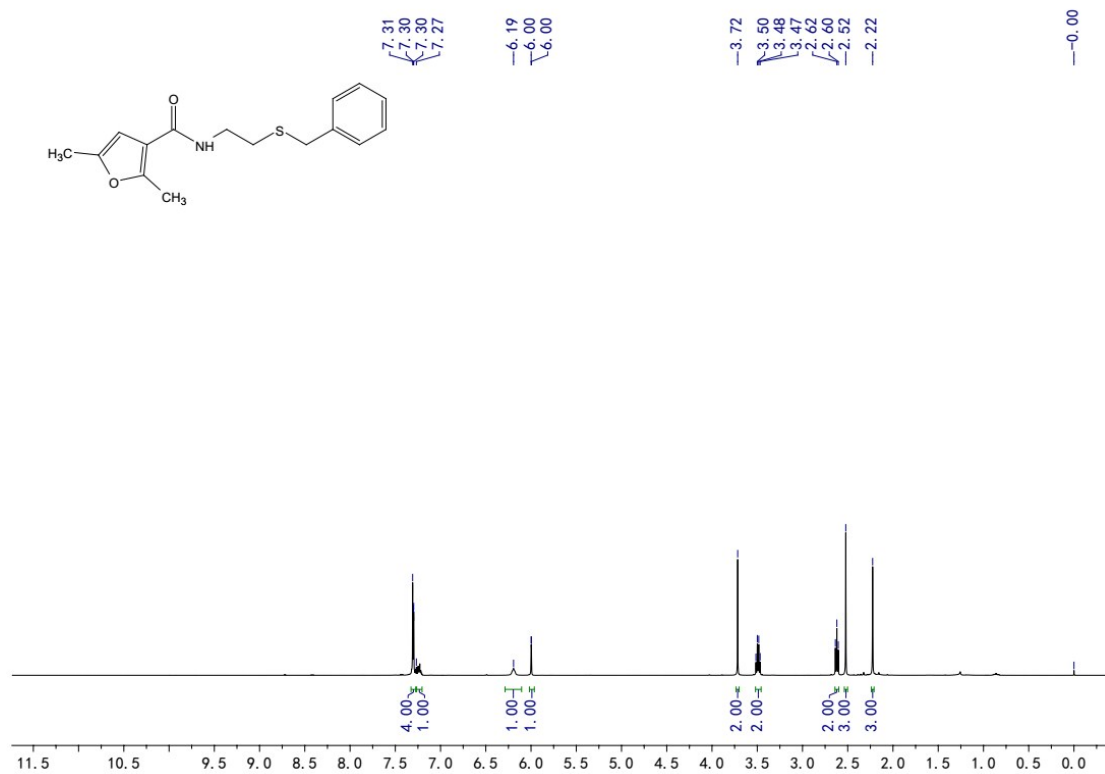

### <sup>13</sup>C NMR of compound **1b**

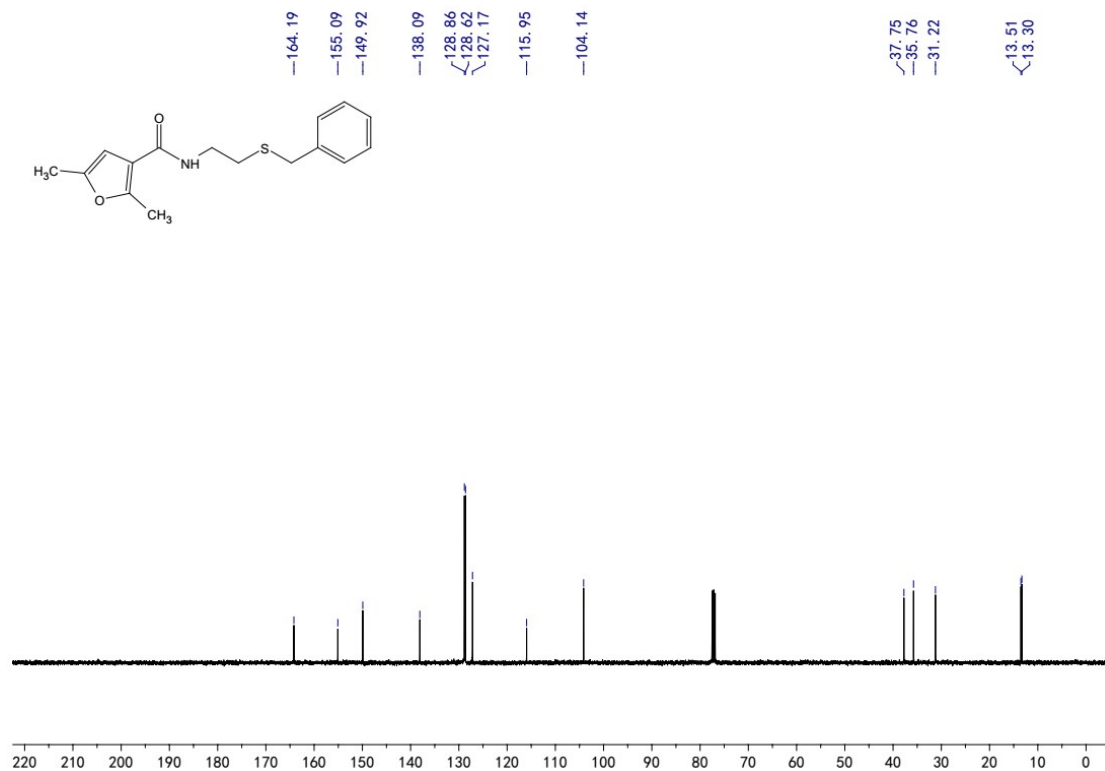

<sup>1</sup>H NMR of compound **1c**

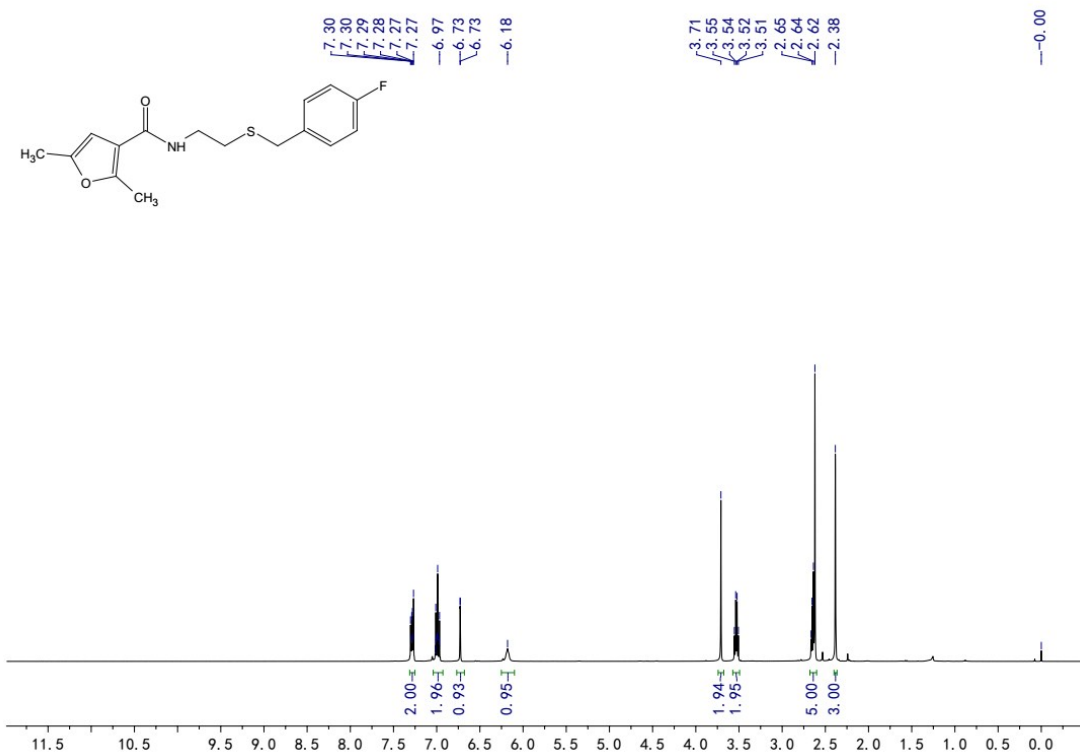

<sup>13</sup>C NMR of compound **1c**

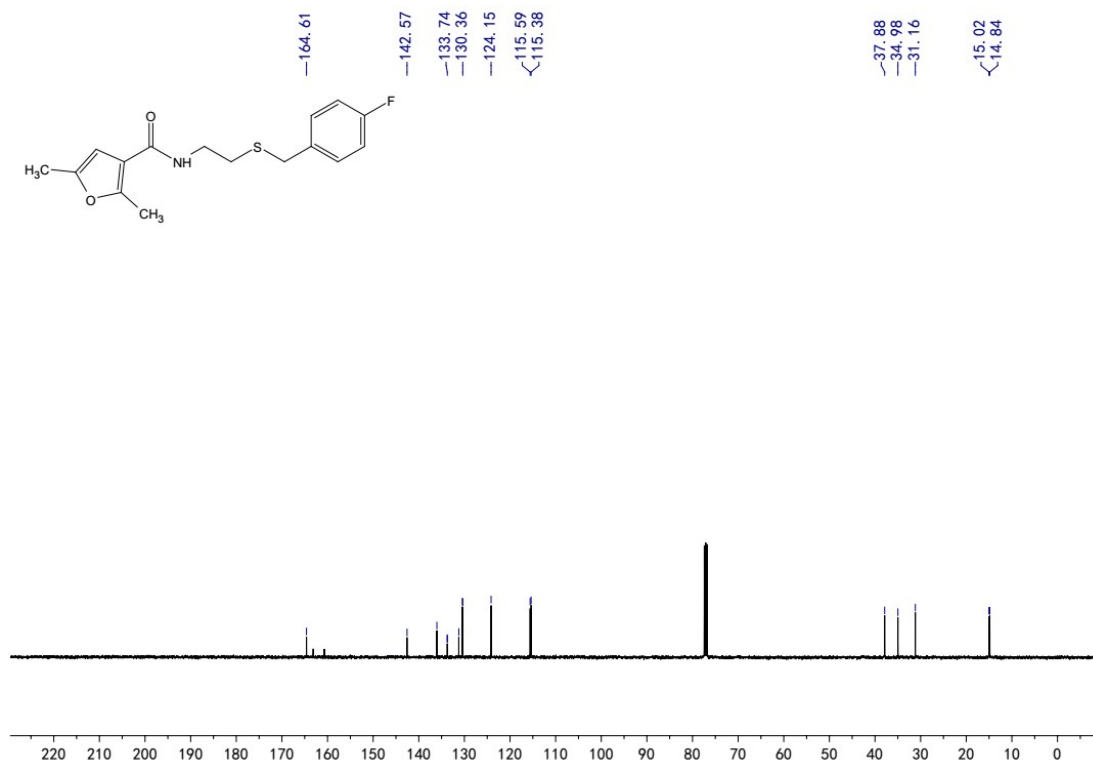

### <sup>1</sup>H NMR of compound **1d**

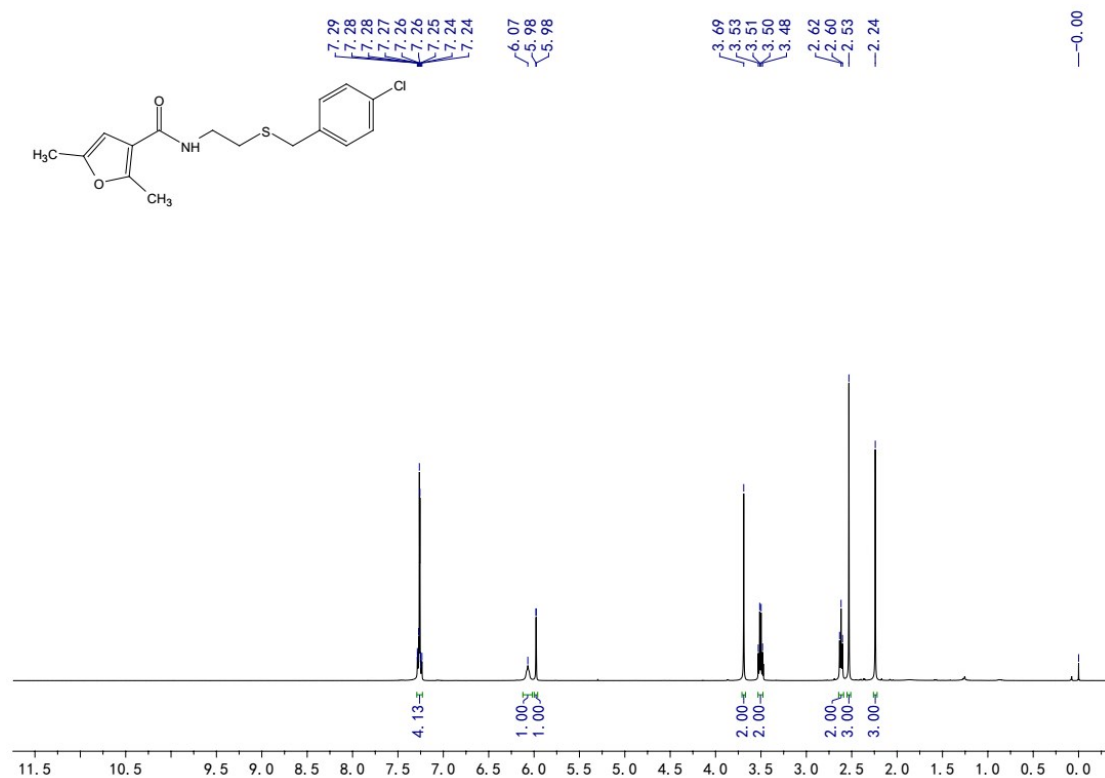

### <sup>13</sup>C NMR of compound **1d**

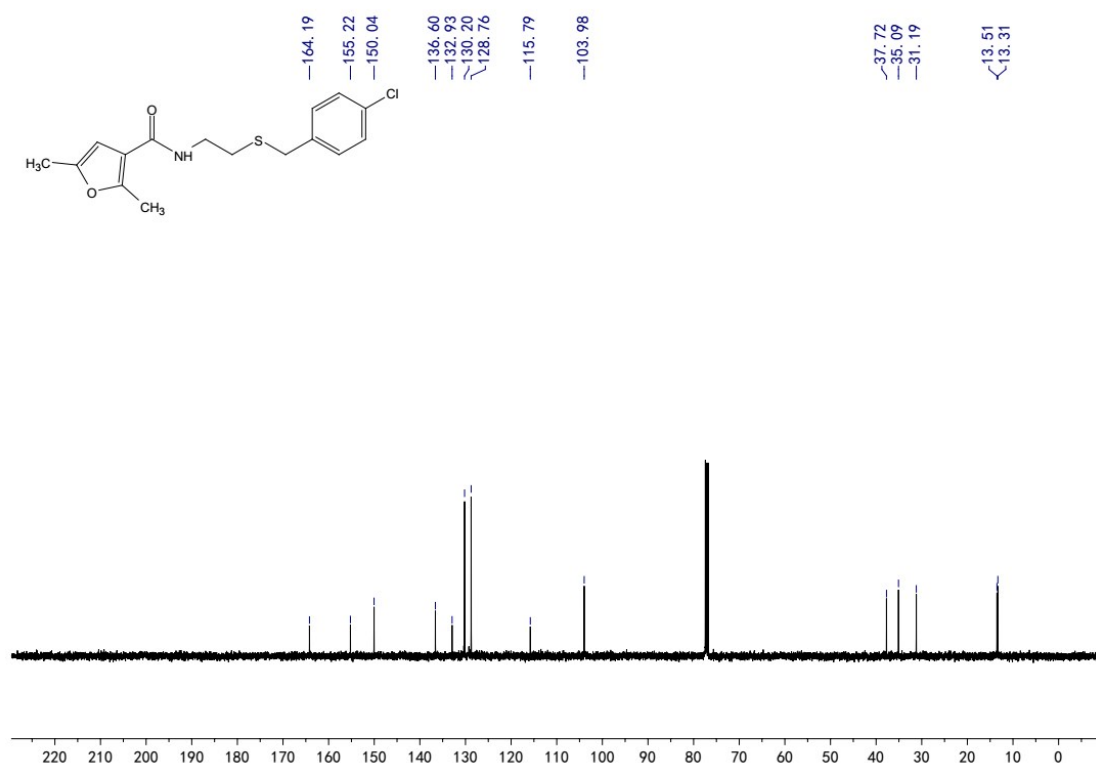

### $^1\text{H}$ NMR of compound **1e**

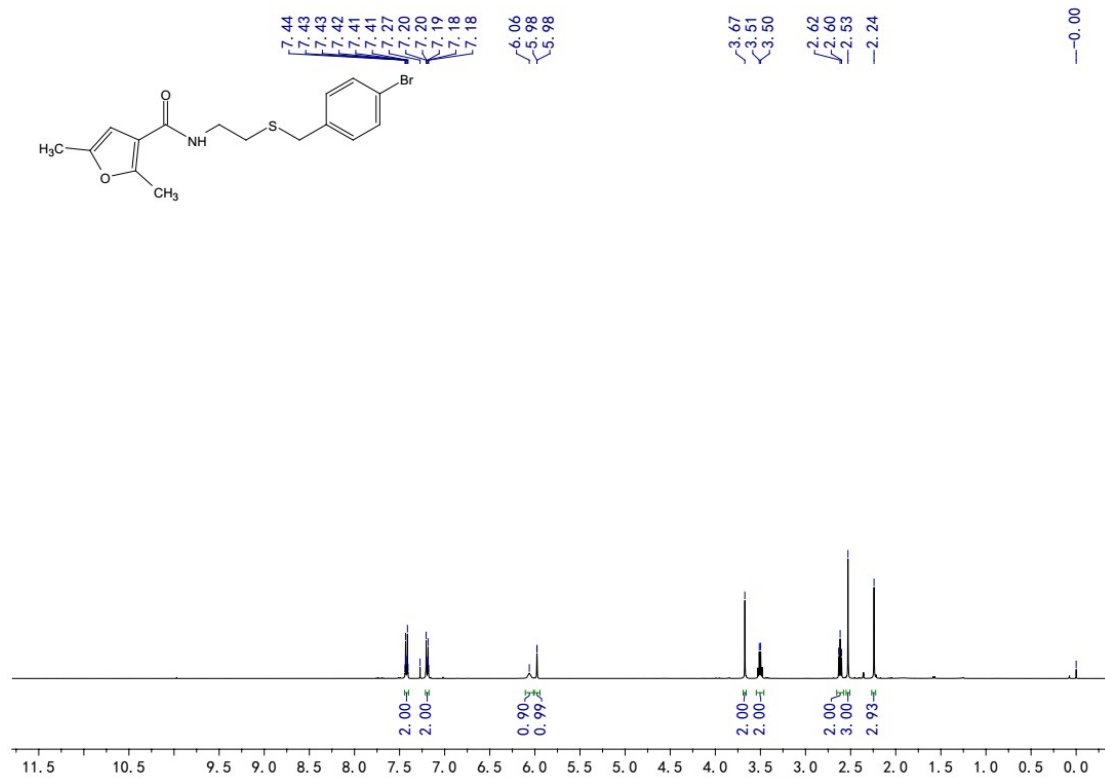

### $^{13}\text{C}$ NMR of compound **1e**

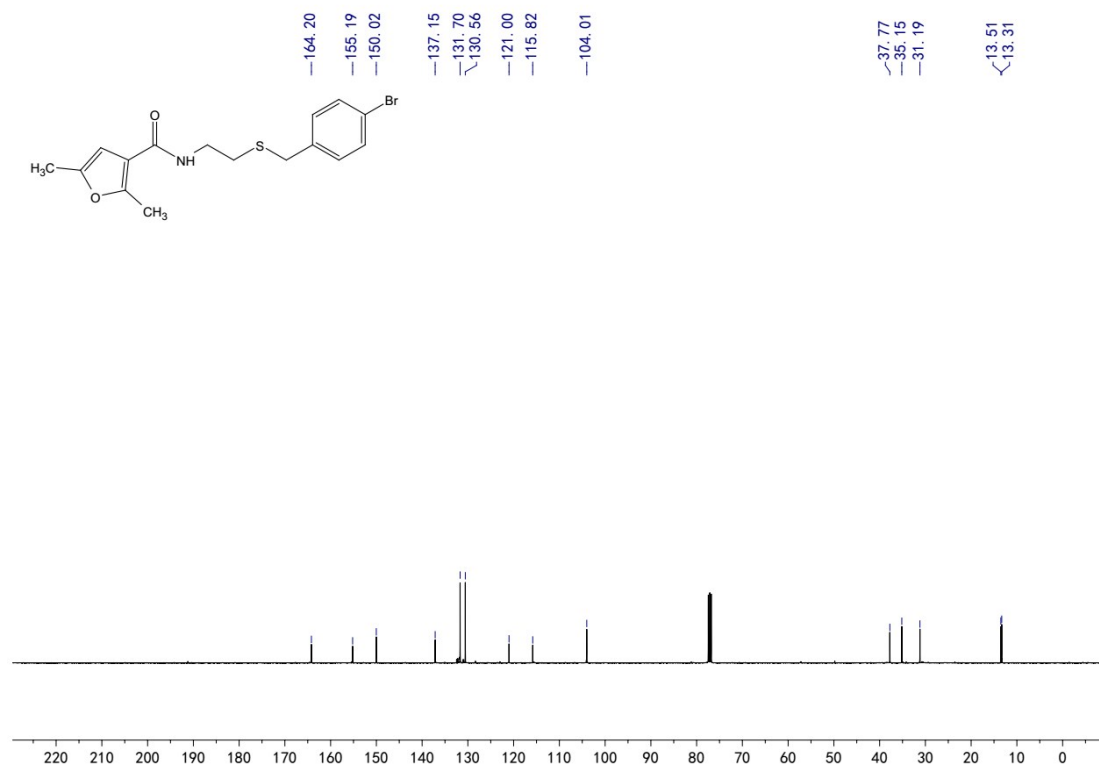

### $^1\text{H}$ NMR of compound **1f**

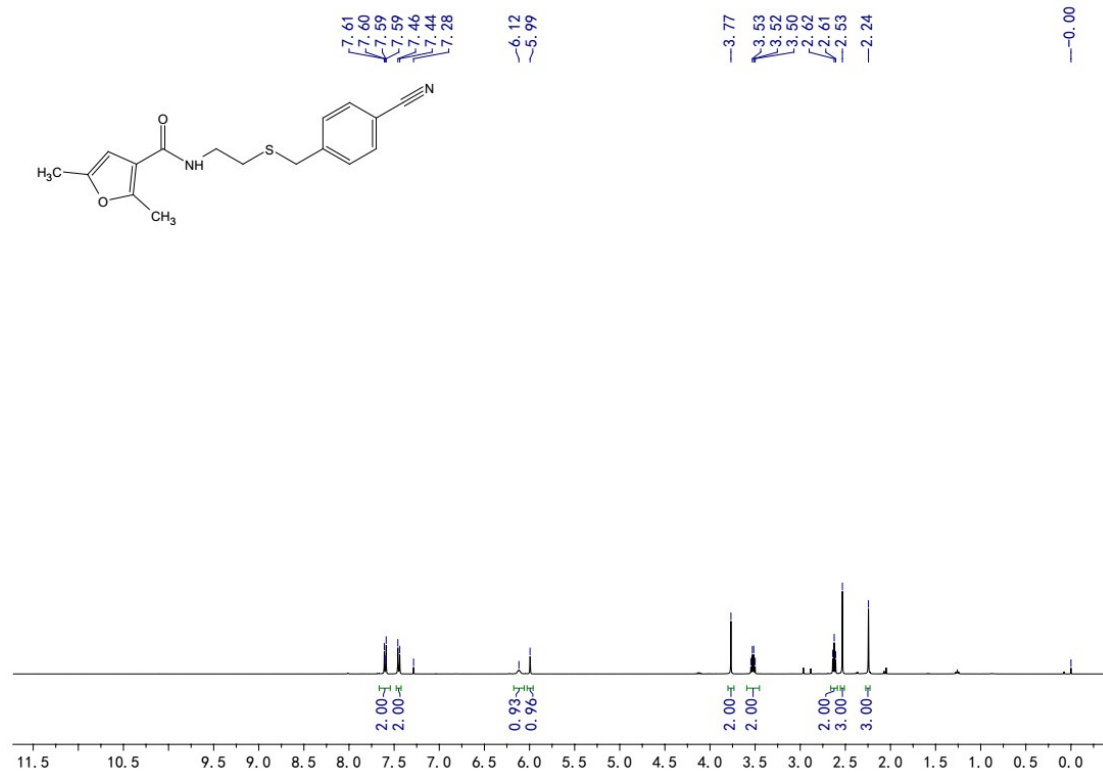

### $^{13}\text{C}$ NMR of compound **1f**

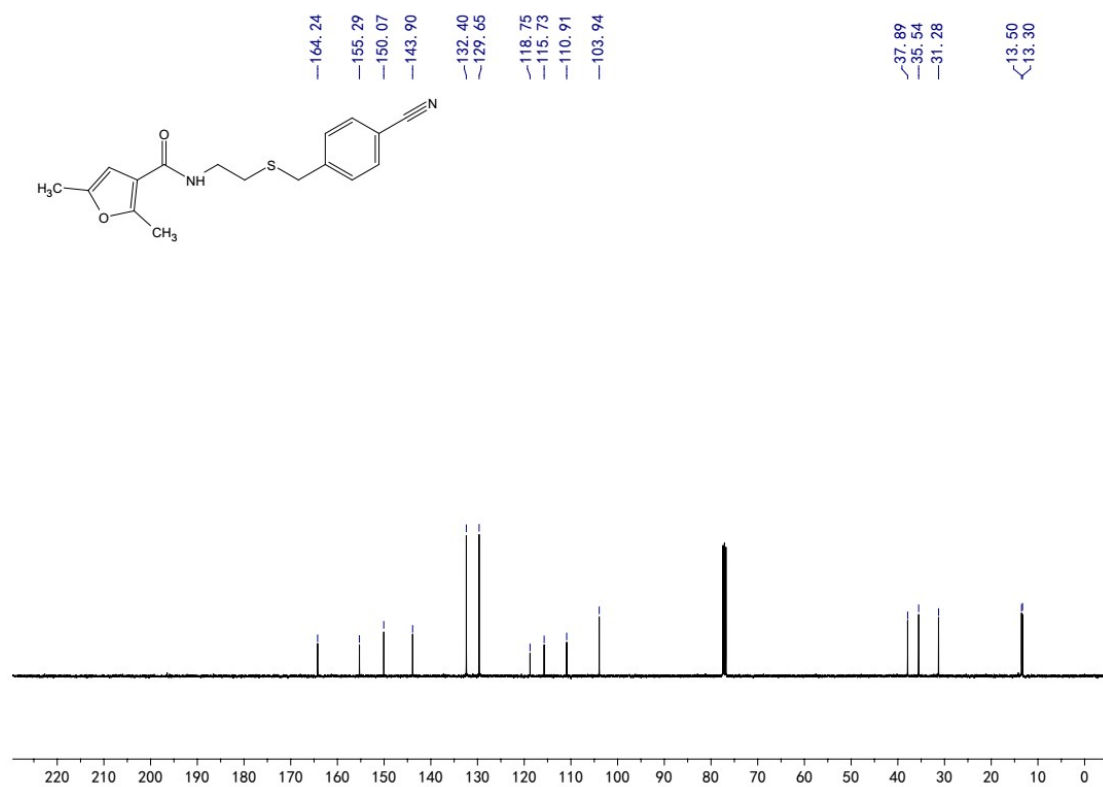

### $^1\text{H}$ NMR of compound **1g**

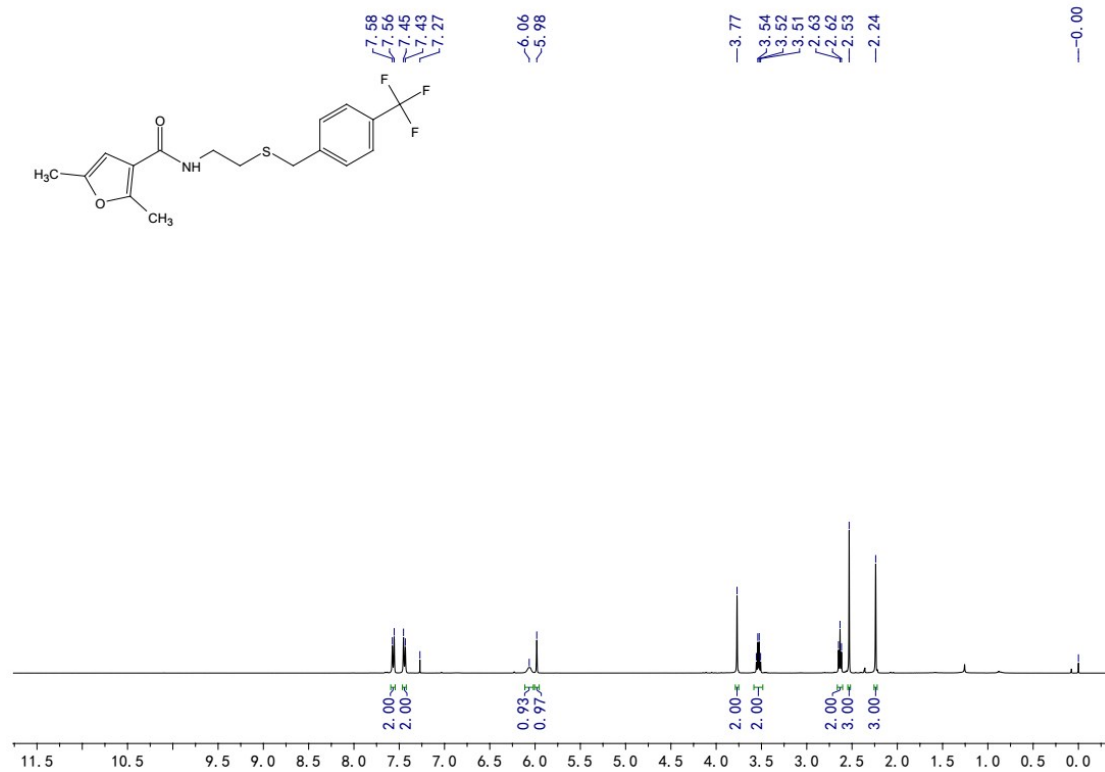

### $^{13}\text{C}$ NMR of compound **1g**

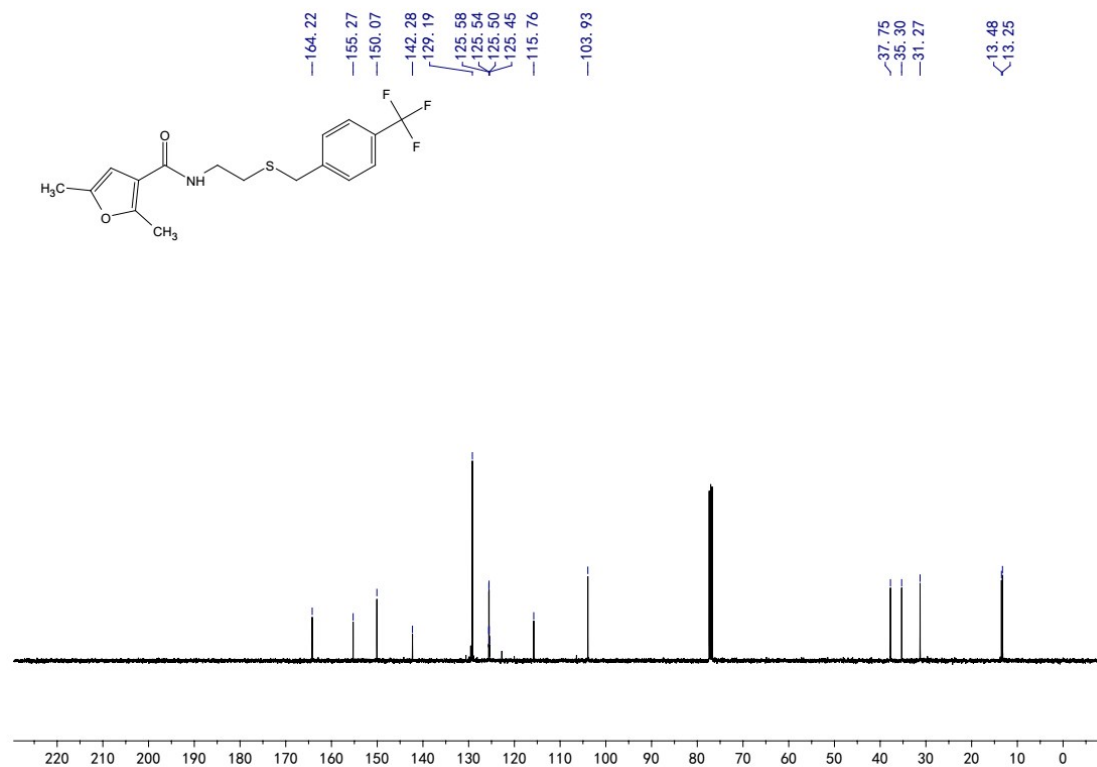



### <sup>1</sup>H NMR of compound **1h**

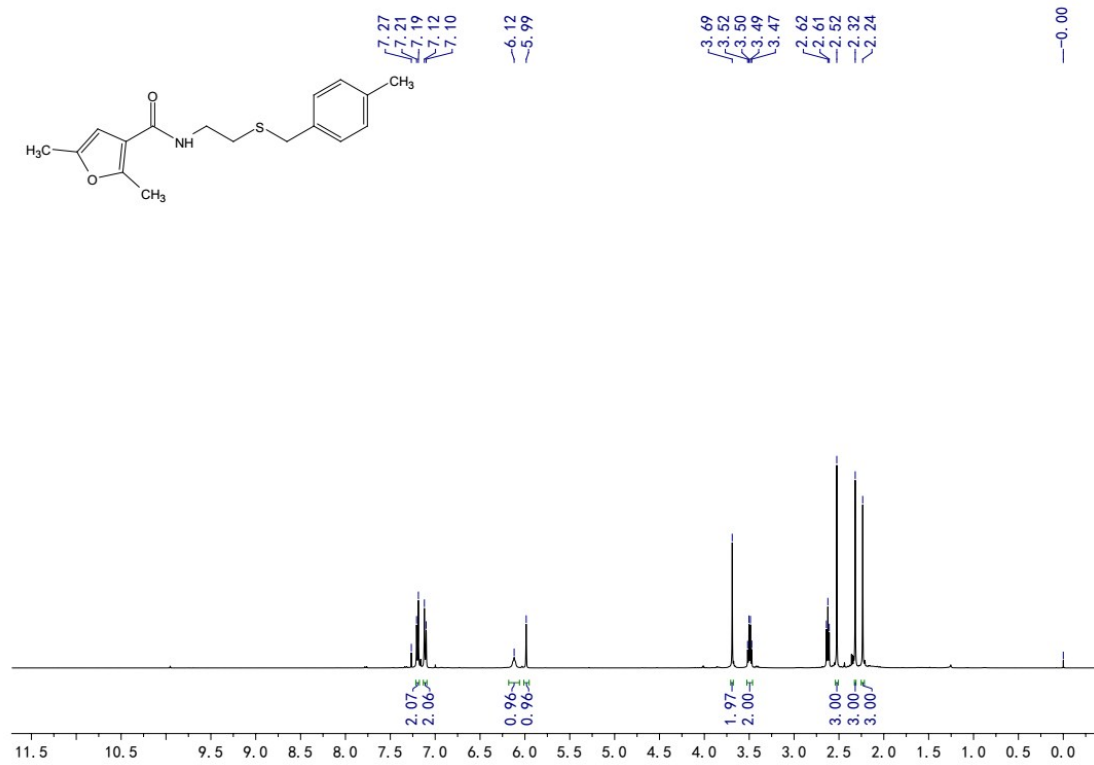

### <sup>13</sup>C NMR of compound **1h**

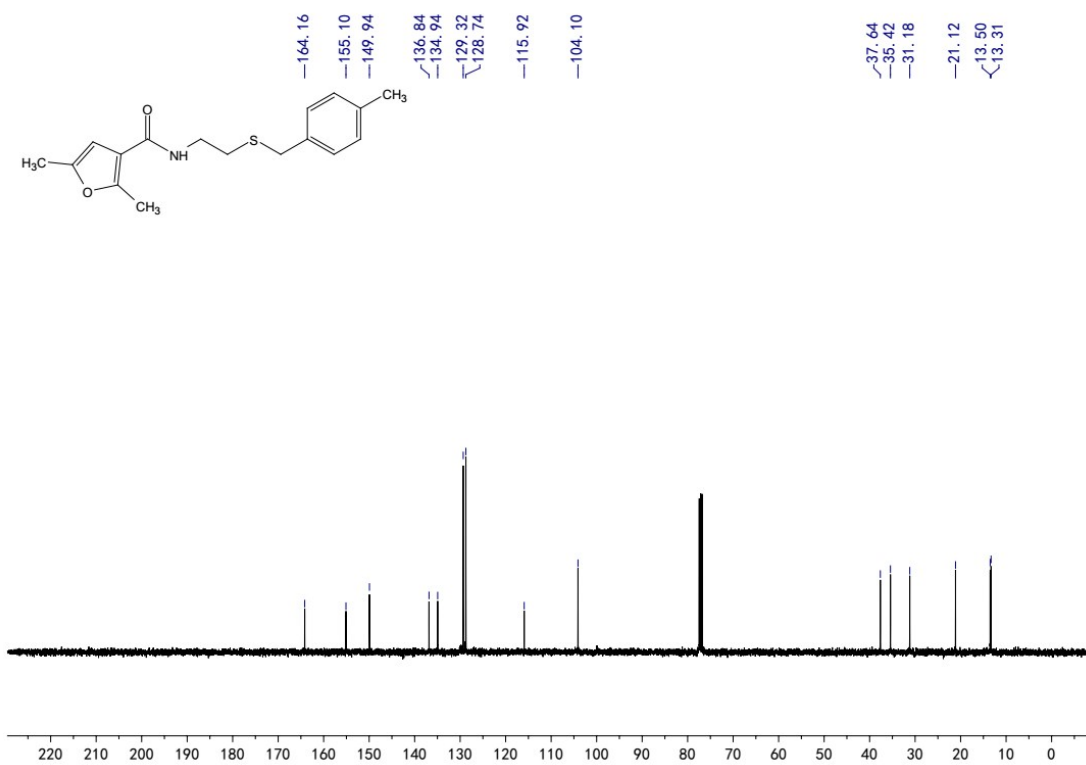

### <sup>1</sup>H NMR of compound **1i**

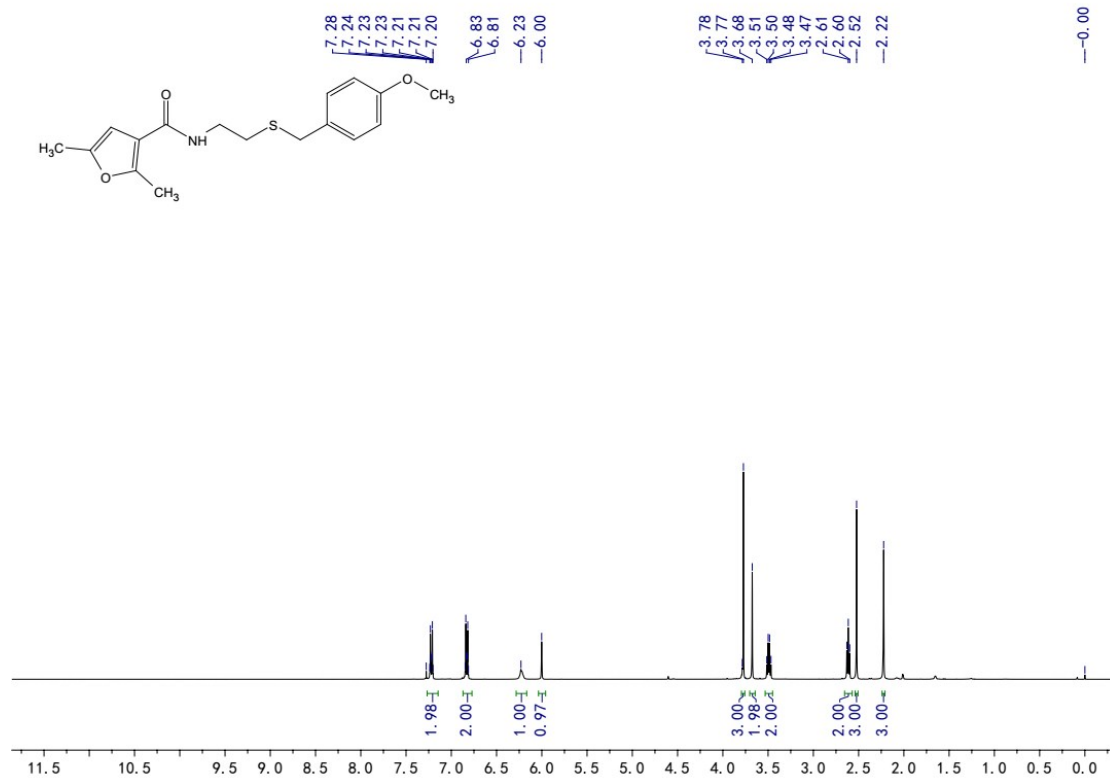

### <sup>13</sup>C NMR of compound **1i**

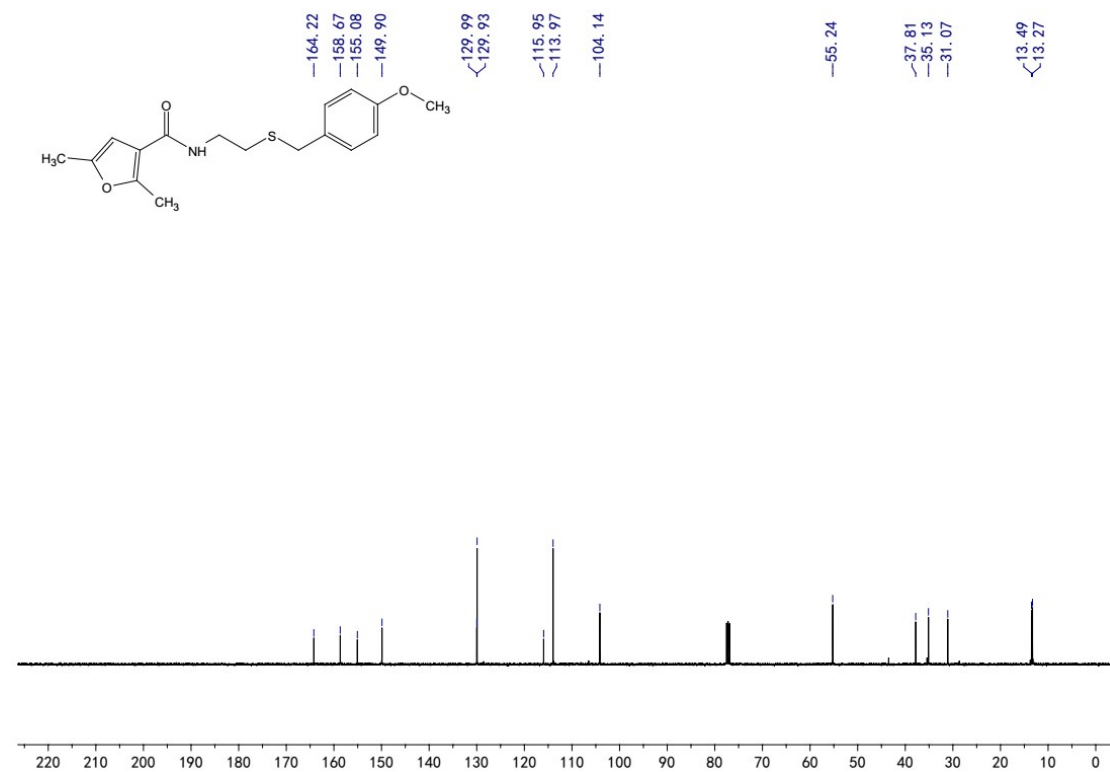

<sup>1</sup>H NMR of compound **1j**

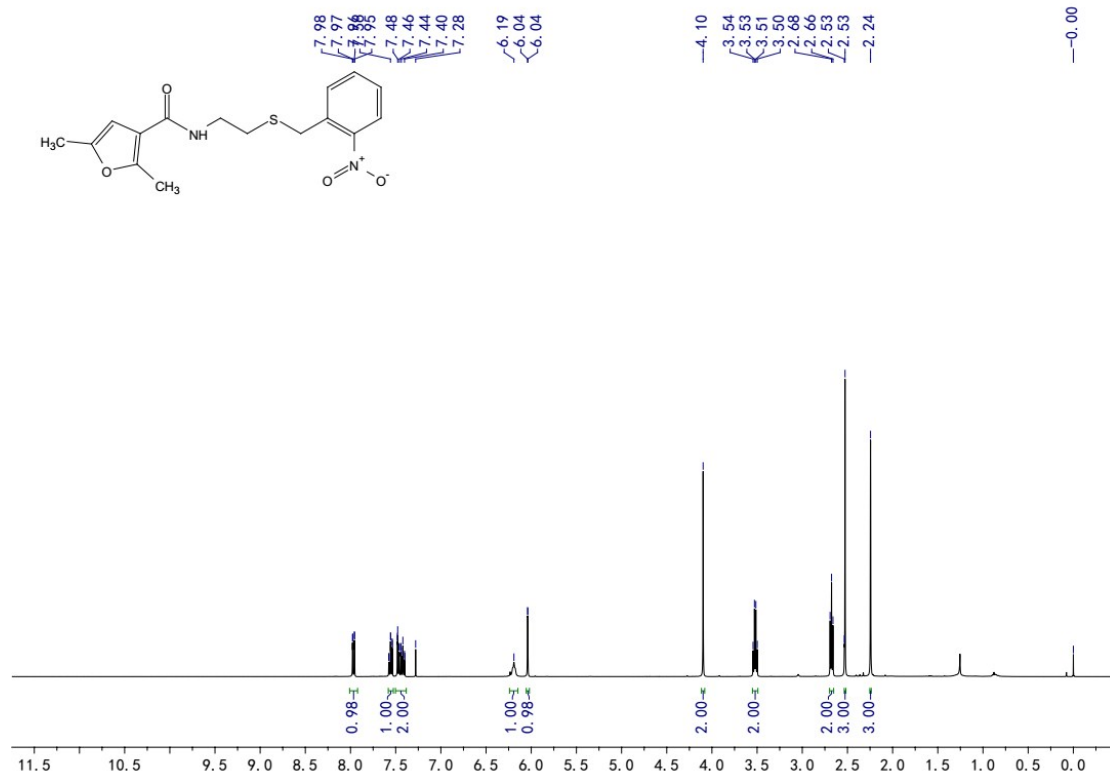

<sup>13</sup>C NMR of compound **1j**

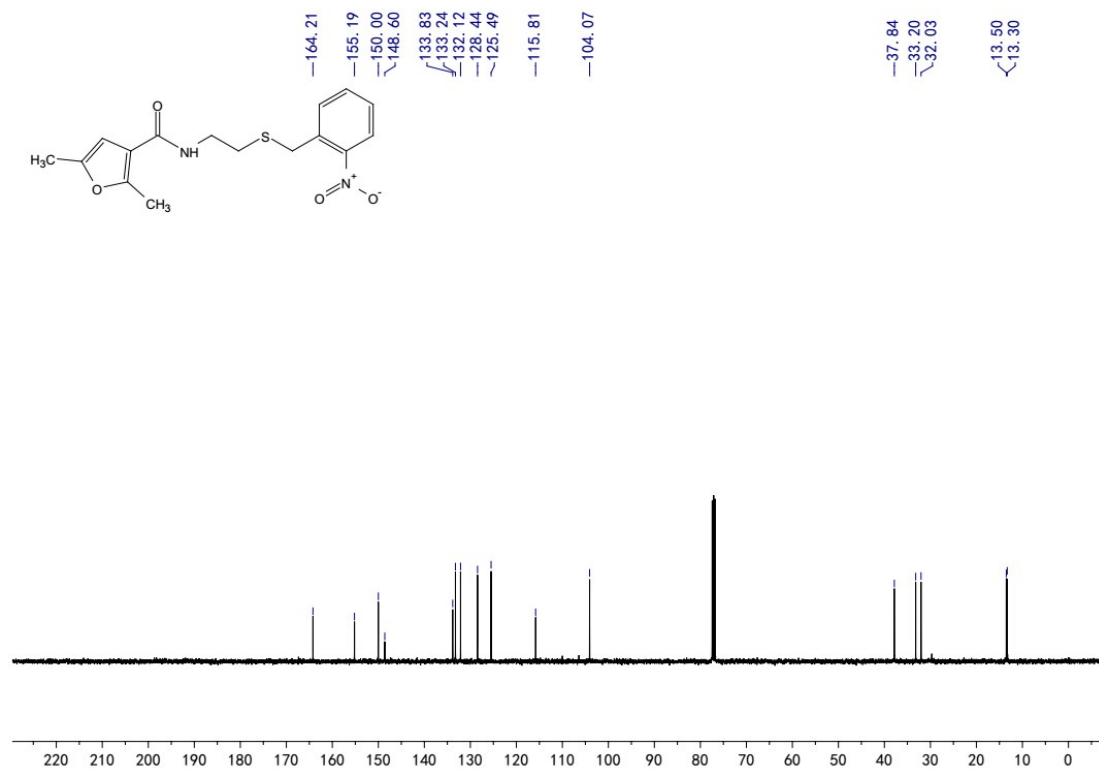

<sup>1</sup>H NMR of compound 1k

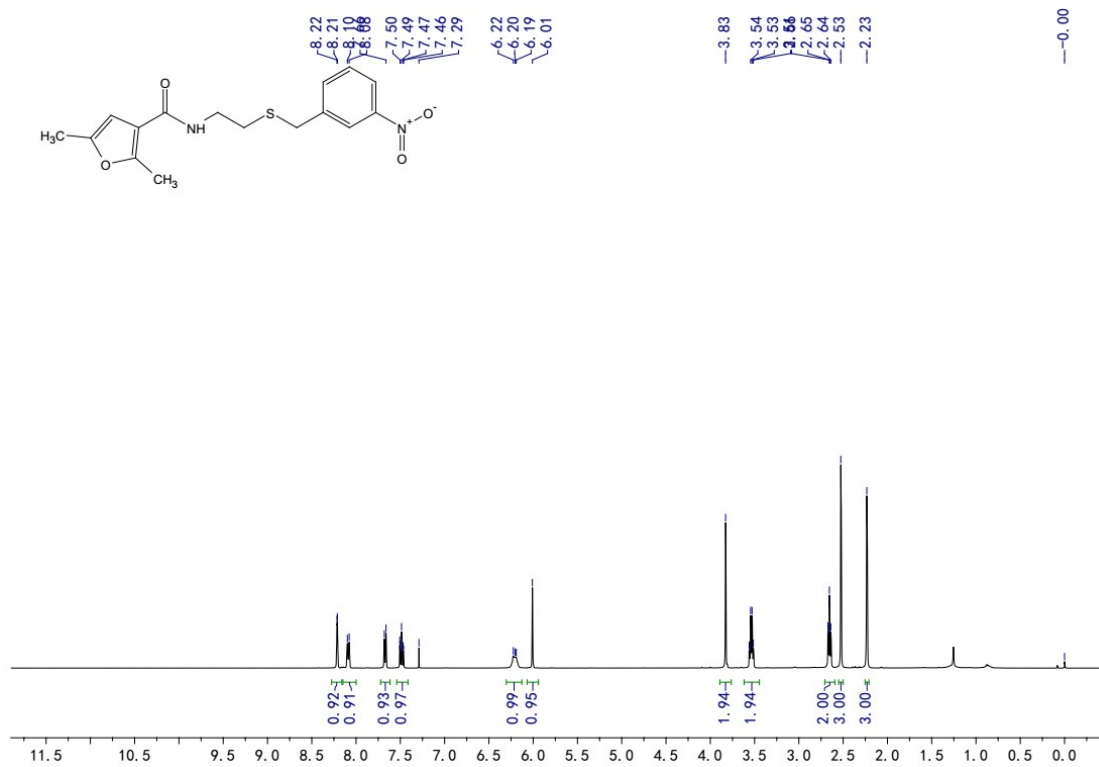

<sup>13</sup>C NMR of compound 1k

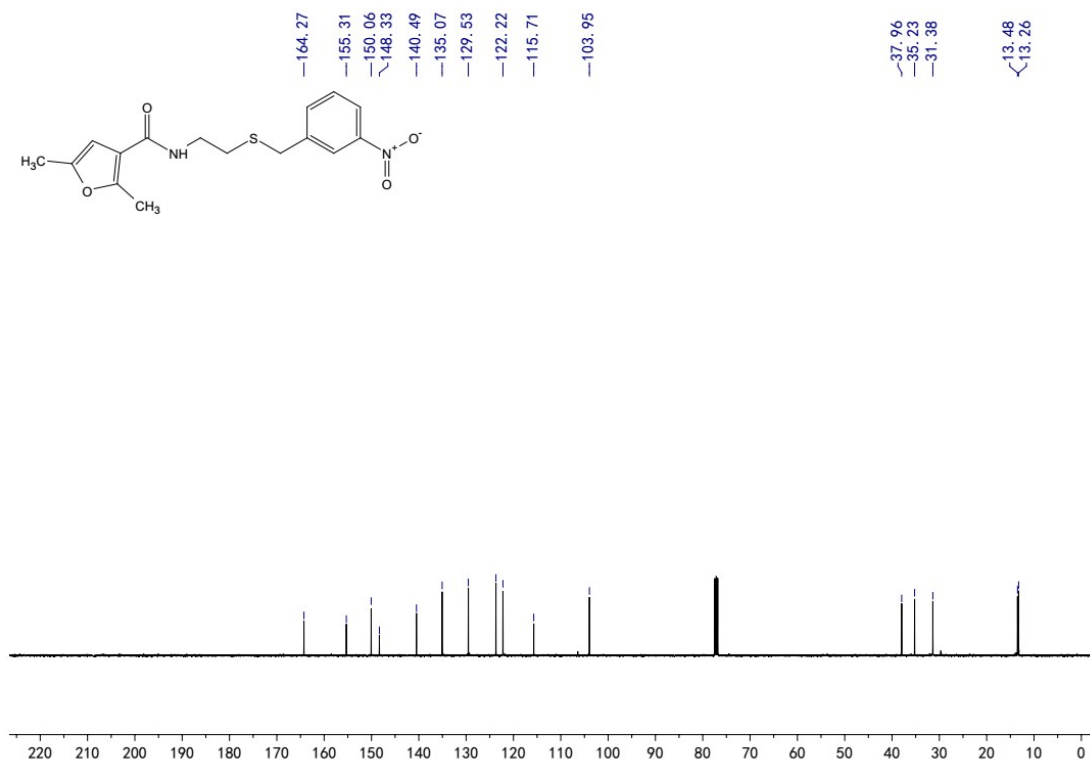

<sup>1</sup>H NMR of compound **11**

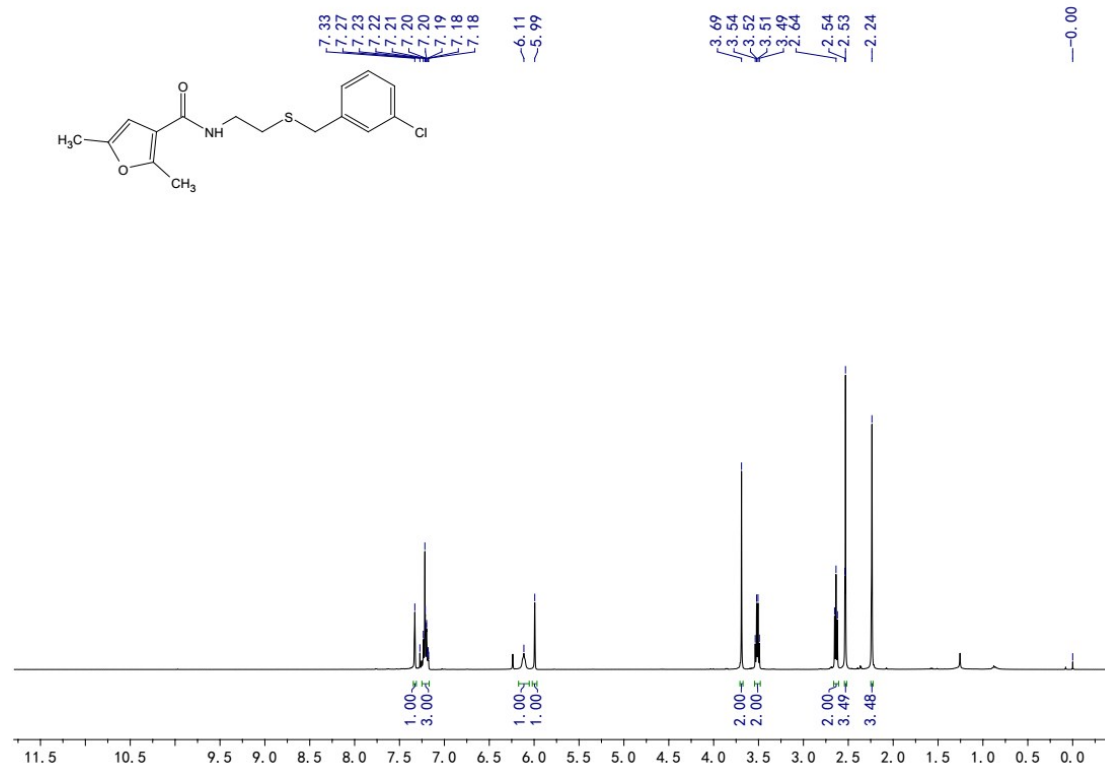

<sup>13</sup>C NMR of compound **11**

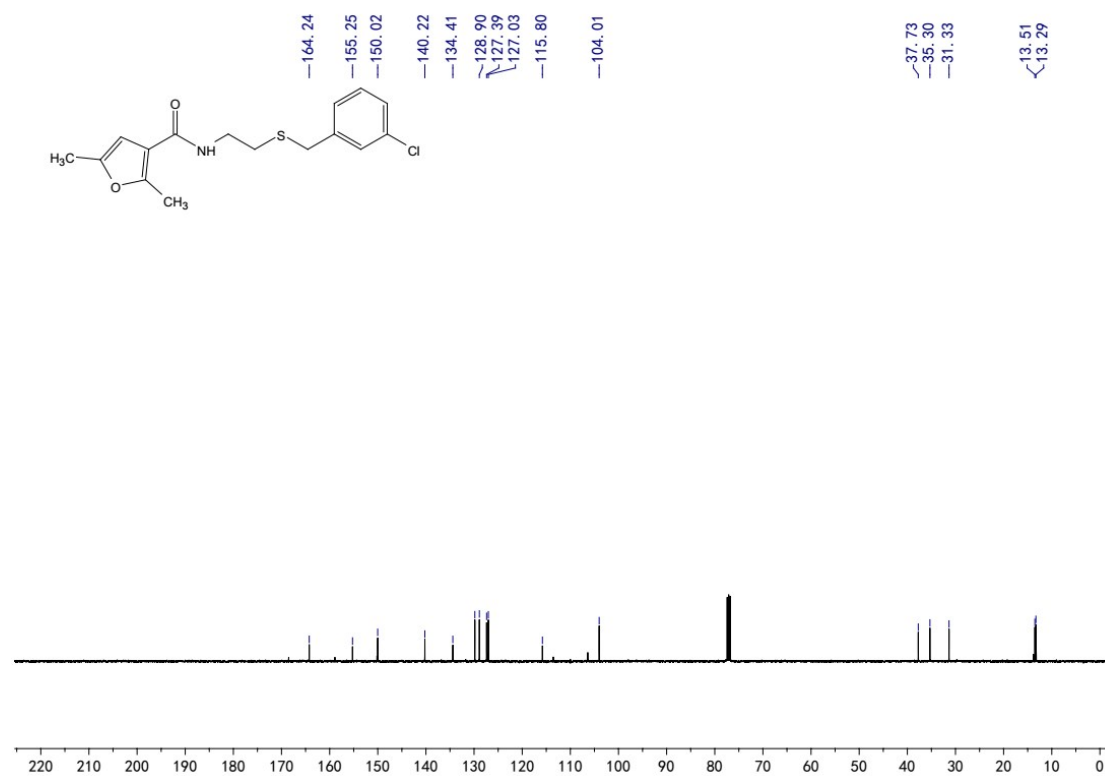

### $^1\text{H}$ NMR of compound **1m**

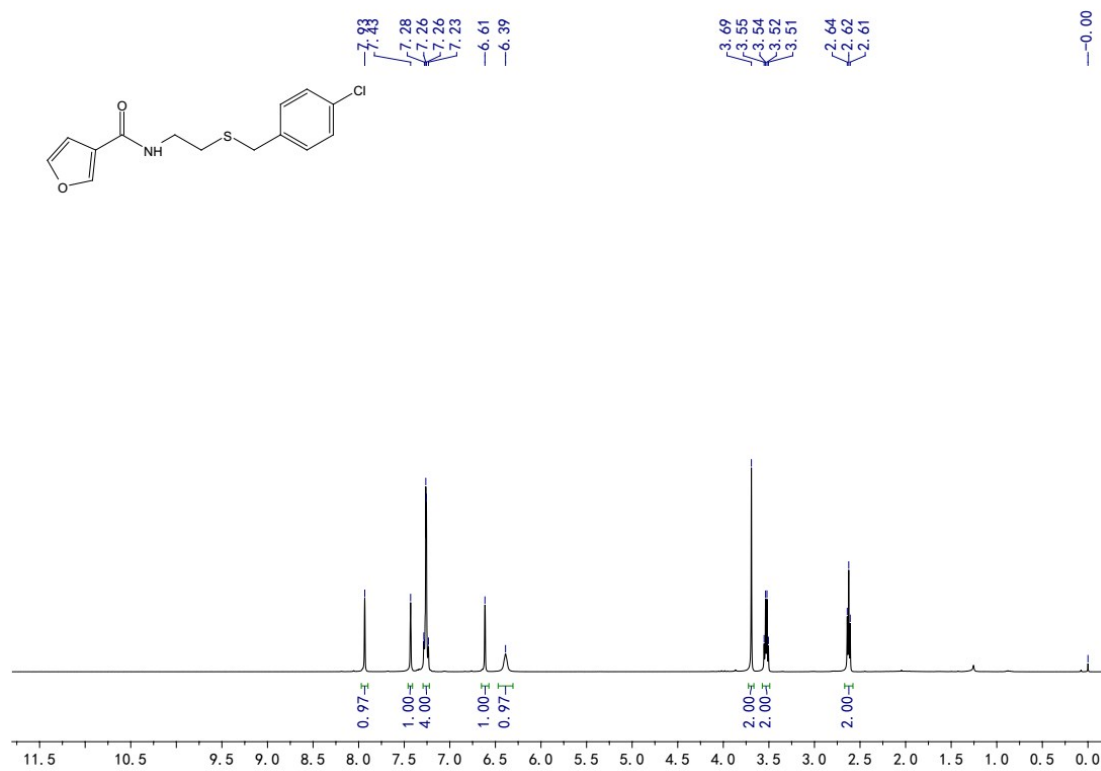

### $^{13}\text{C}$ NMR of compound **1m**

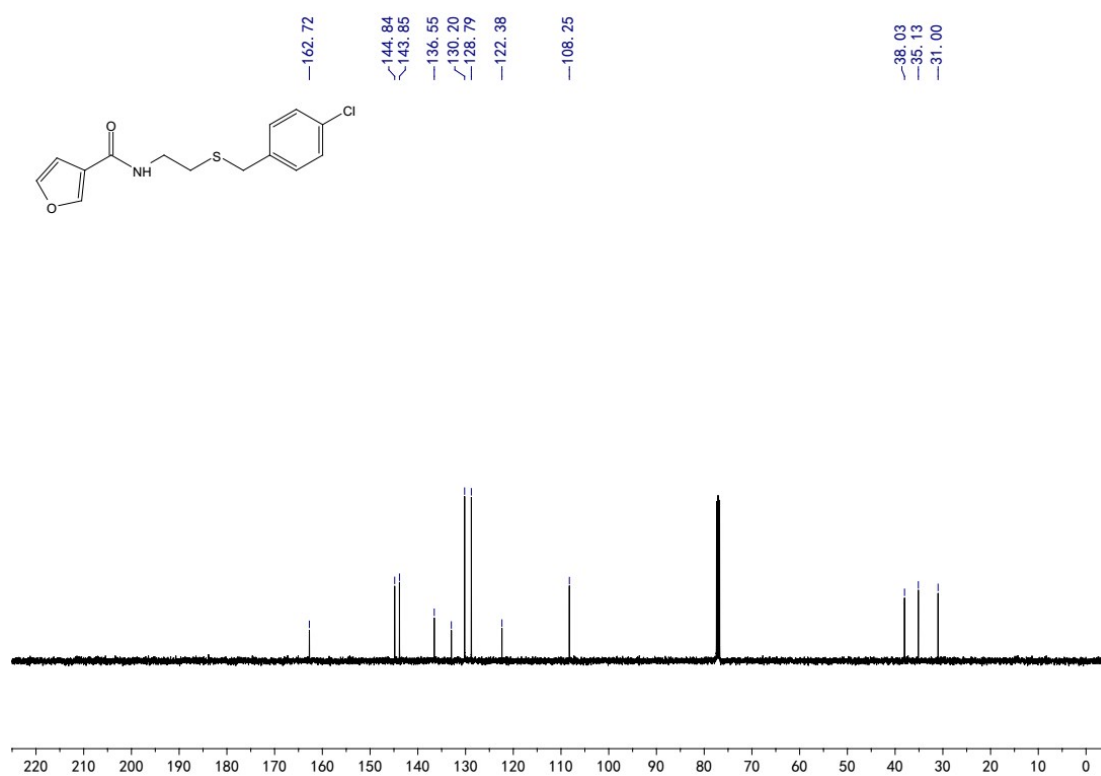

### <sup>1</sup>H NMR of compound **1n**

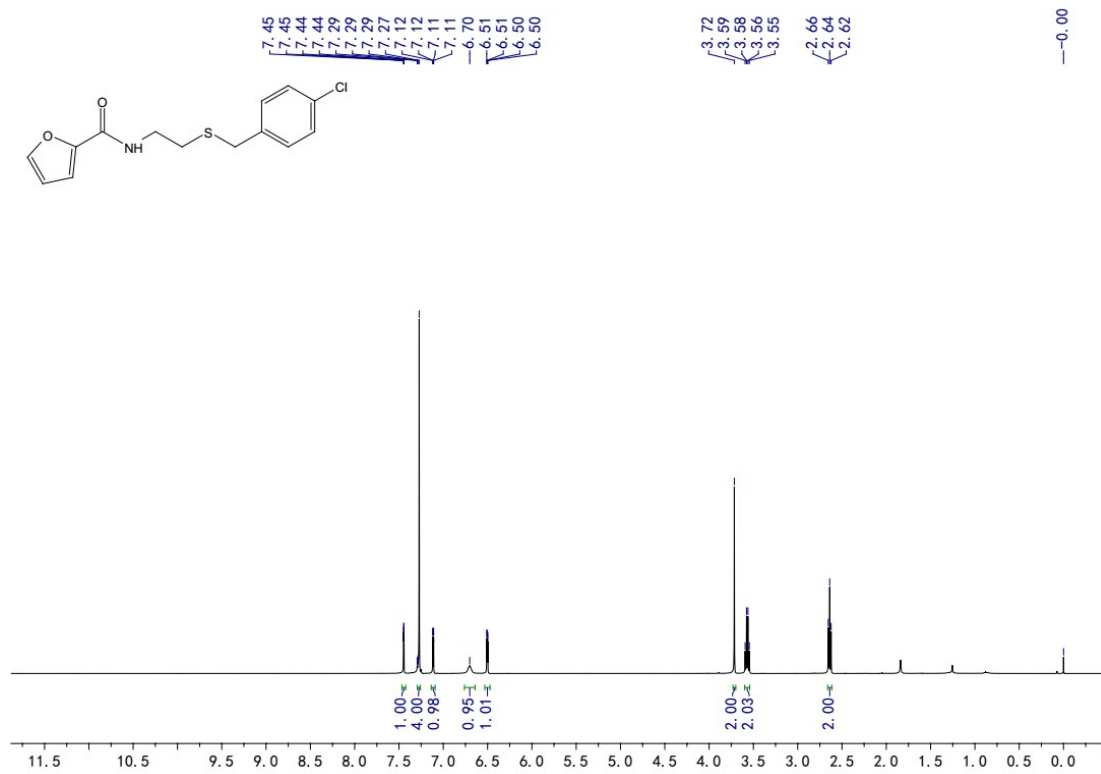

### <sup>13</sup>C NMR of compound **1n**

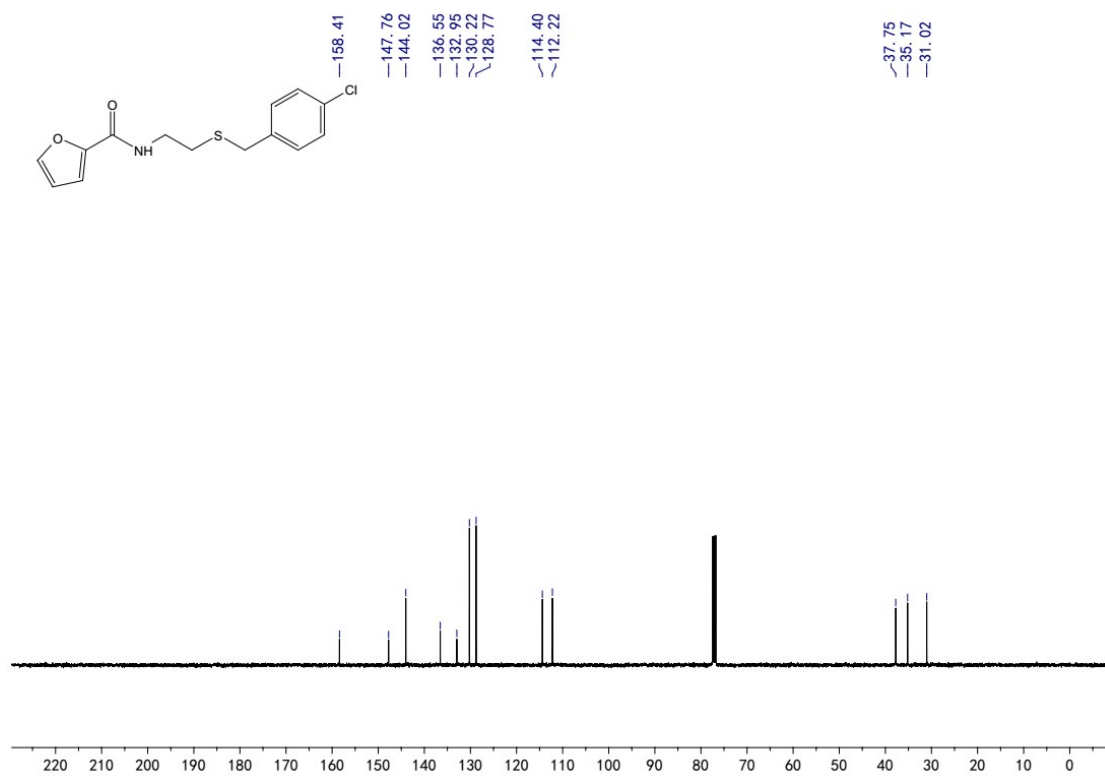

### <sup>1</sup>H NMR of compound **1o**

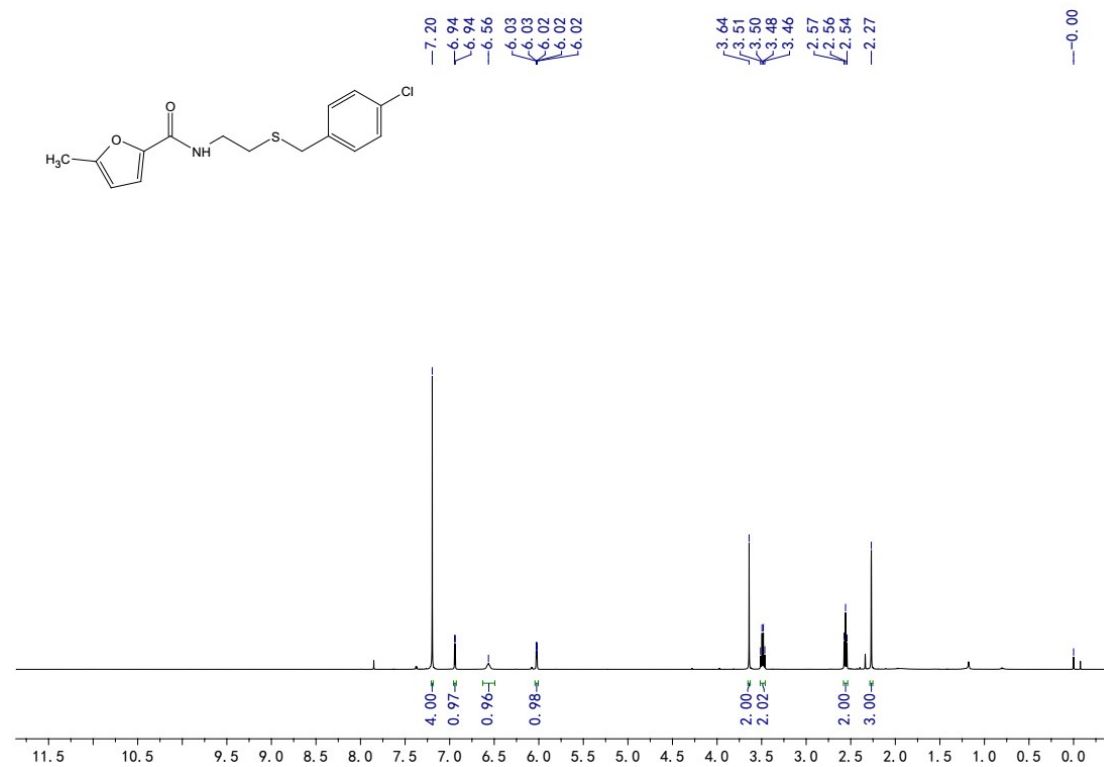

### <sup>13</sup>C NMR of compound **1o**

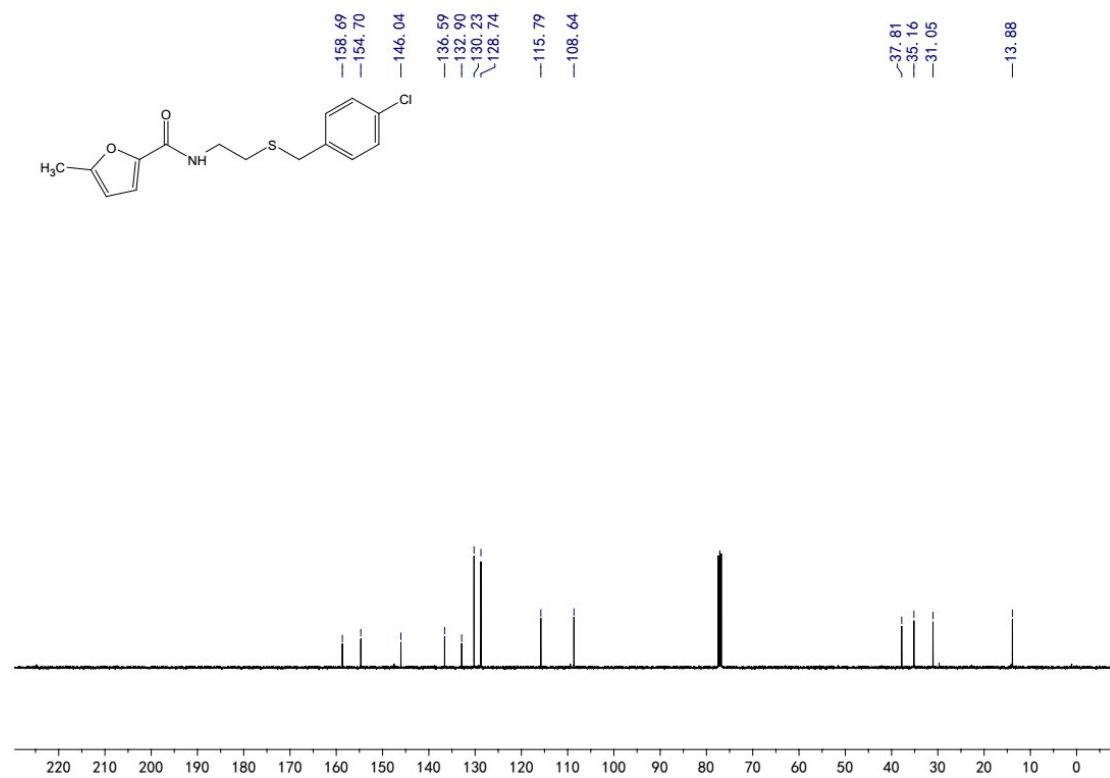



### <sup>1</sup>H NMR of compound **1p**

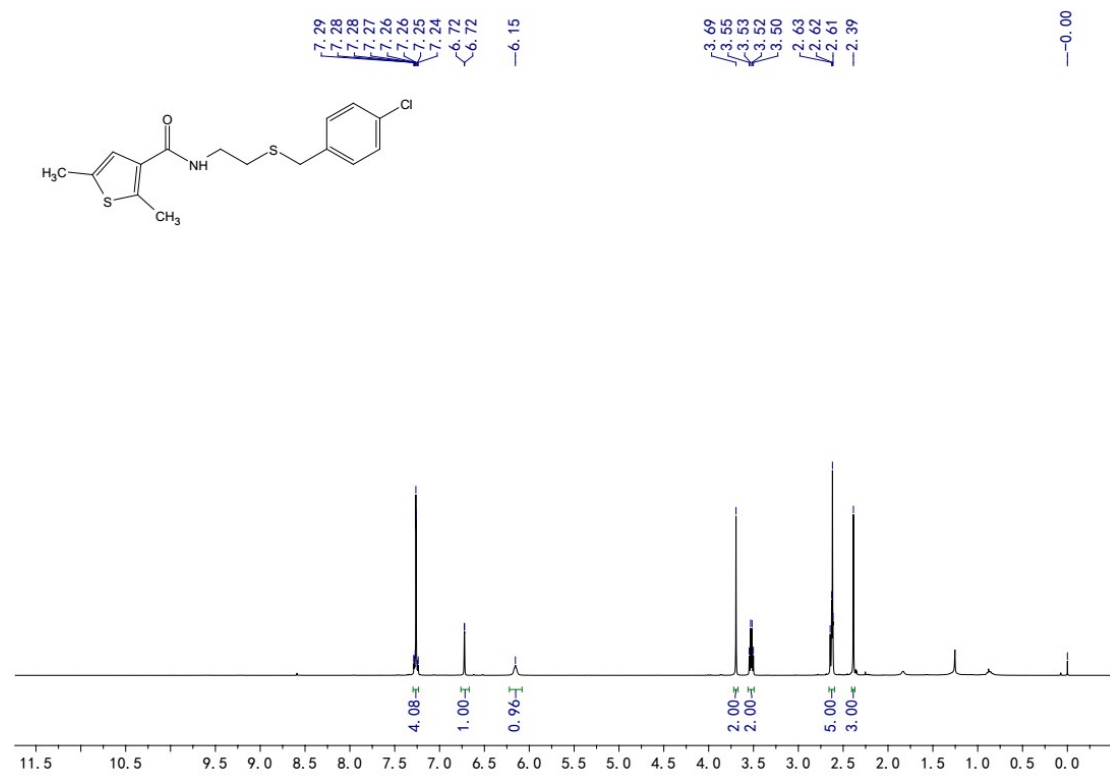

### <sup>13</sup>C NMR of compound **1p**

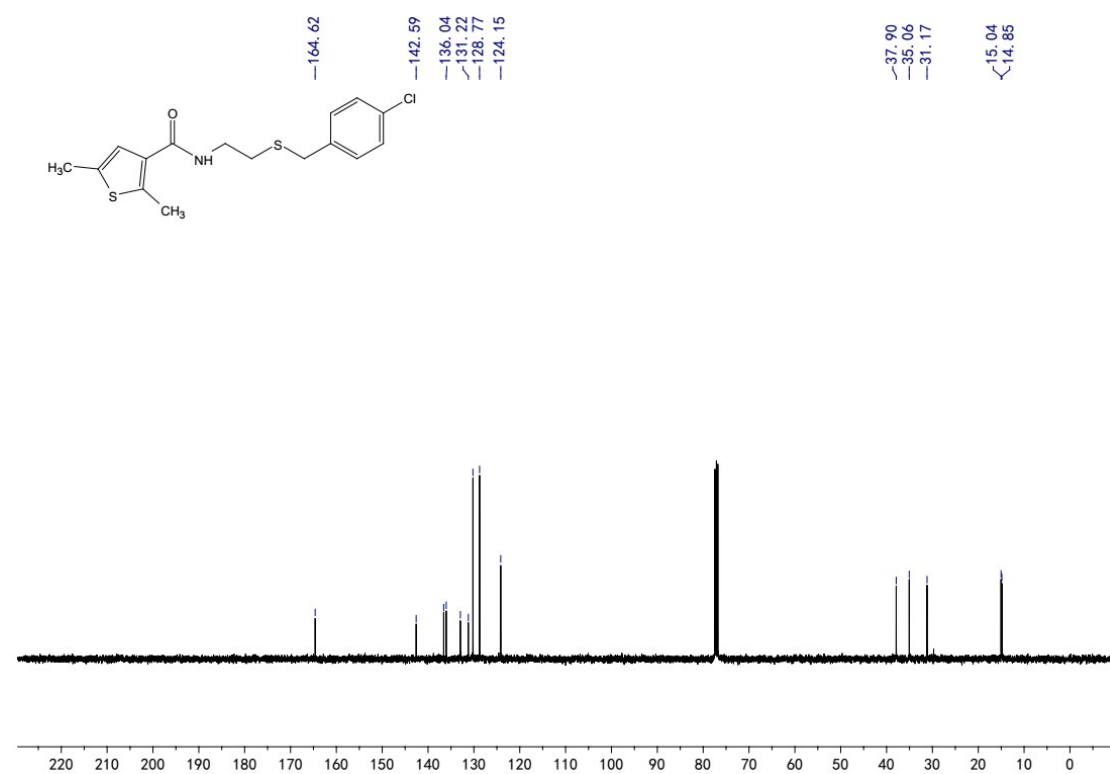

### $^1\text{H}$ NMR of compound **1q**

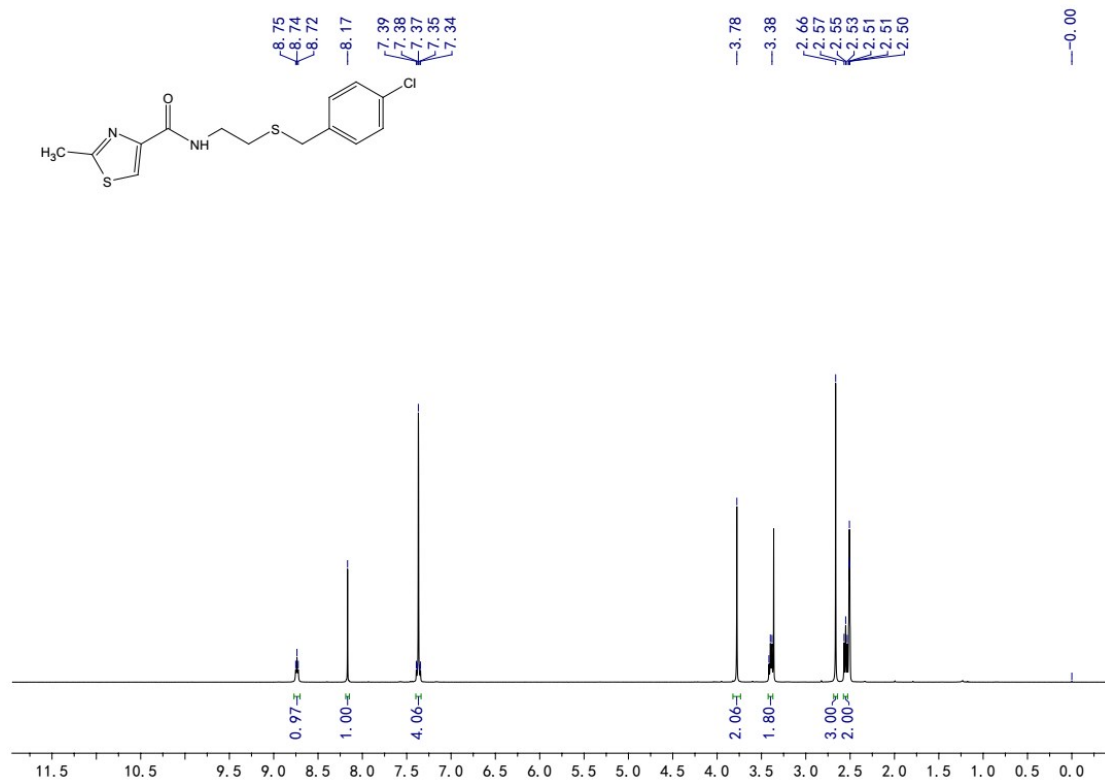

### $^{13}\text{C}$ NMR of compound **1q**

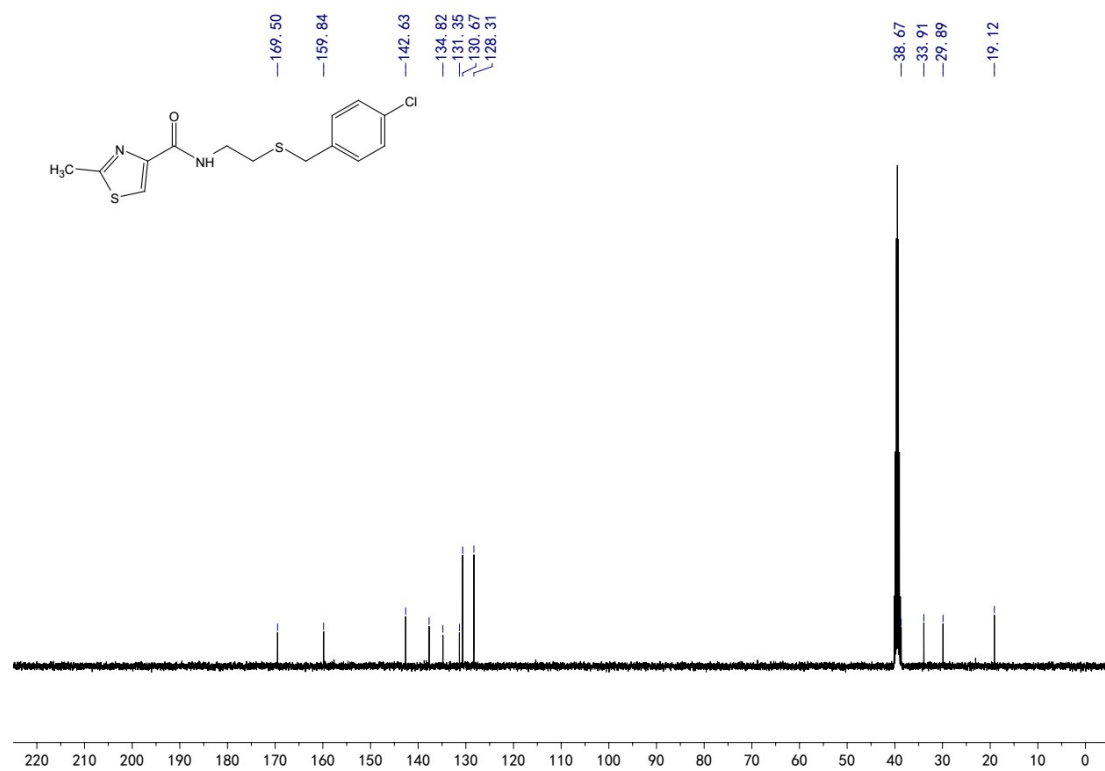

### <sup>1</sup>H NMR of compound **1r**

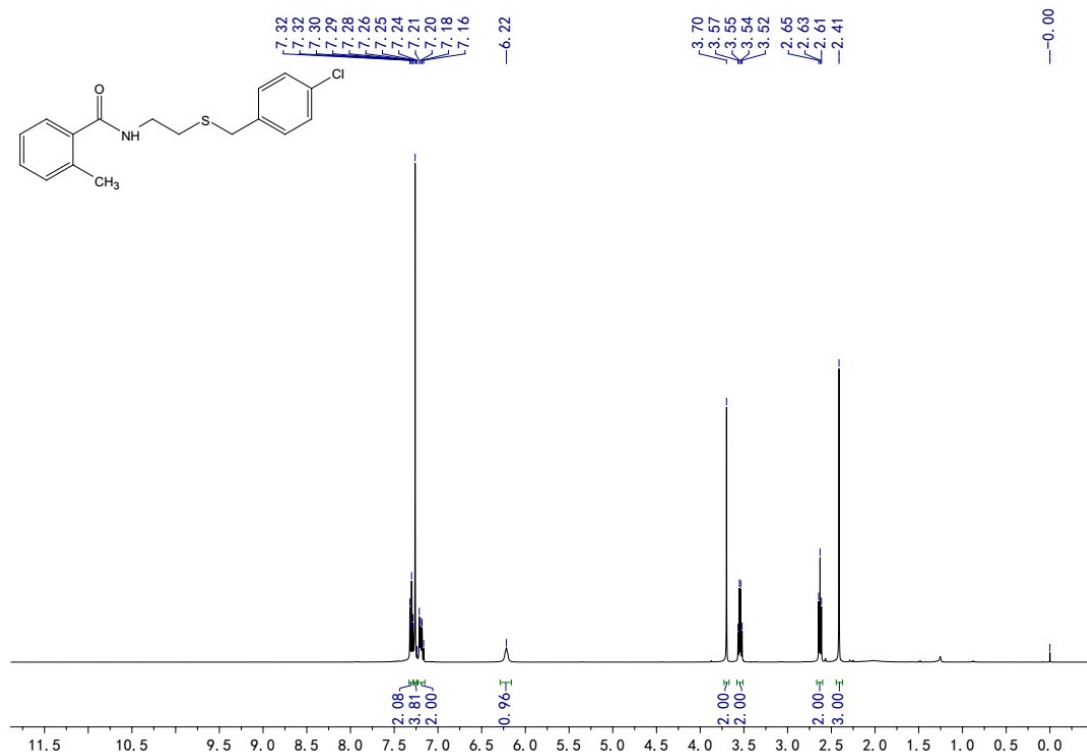

### <sup>13</sup>C NMR of compound **1r**

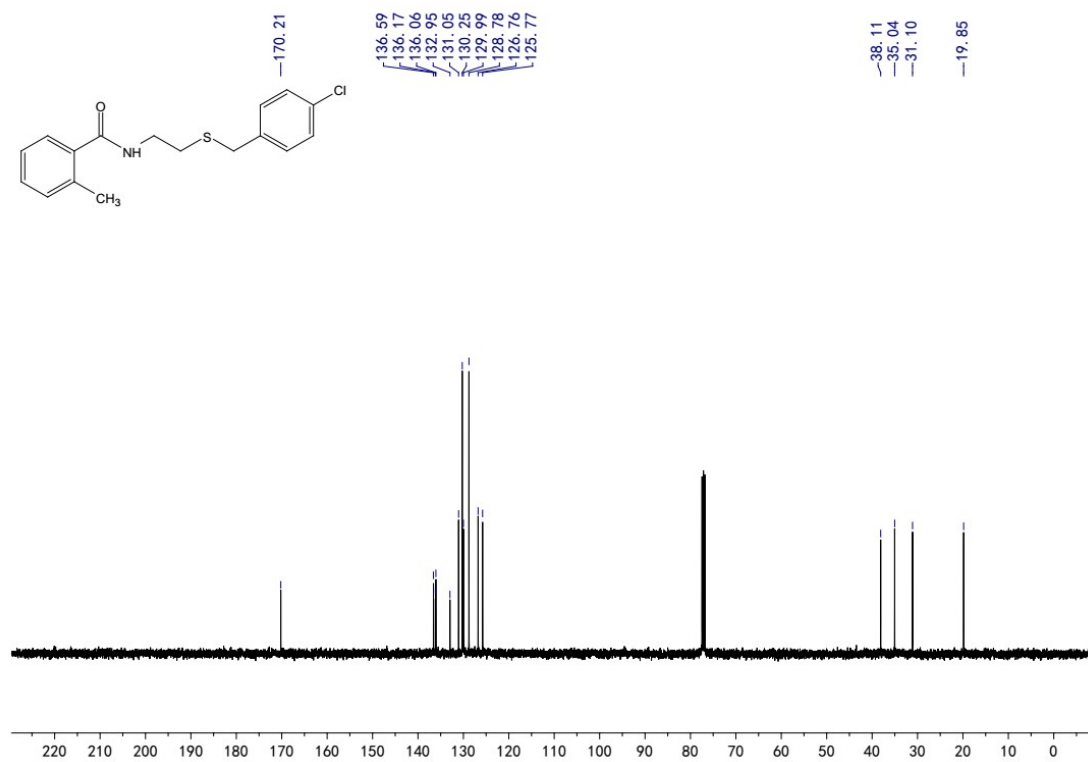

<sup>1</sup>H NMR of compound **1s**

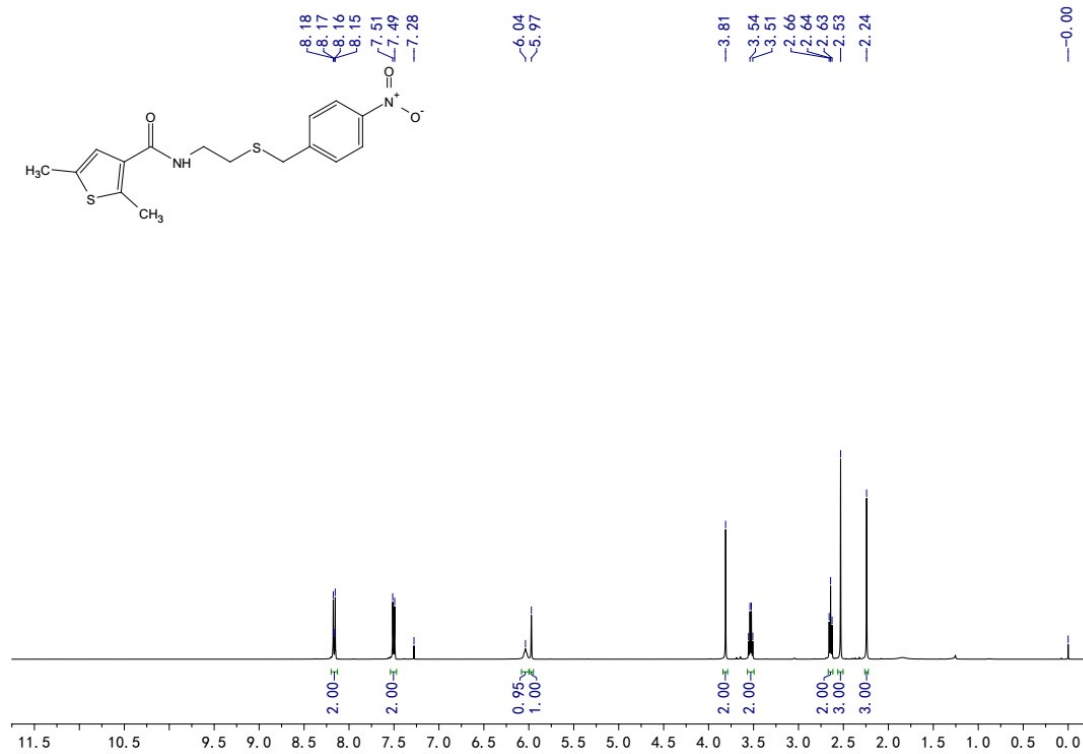

<sup>13</sup>C NMR of compound **1s**

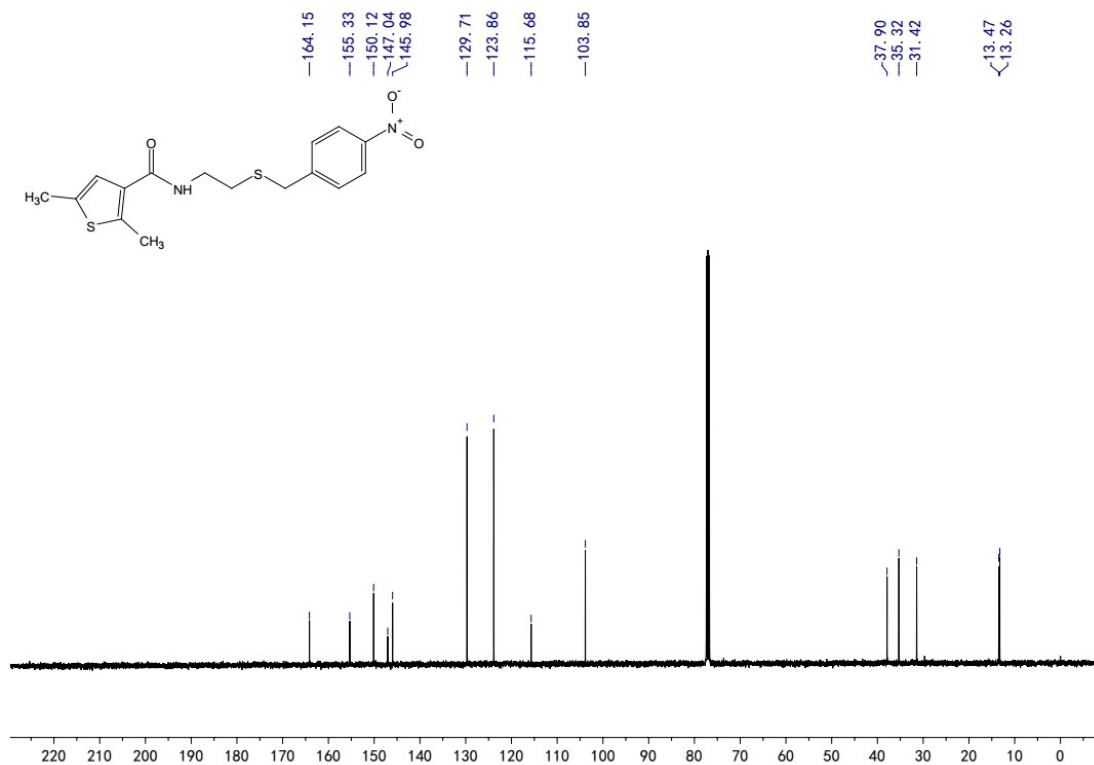

### <sup>1</sup>H NMR of compound **1t**

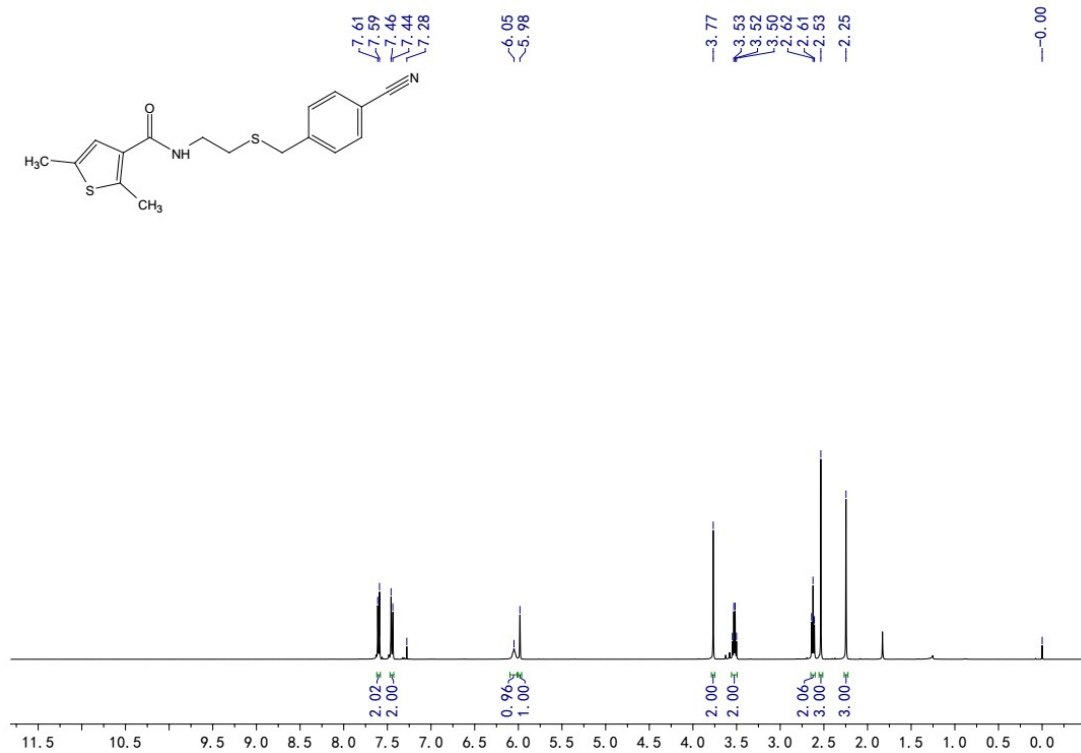

### <sup>13</sup>C NMR of compound **1t**

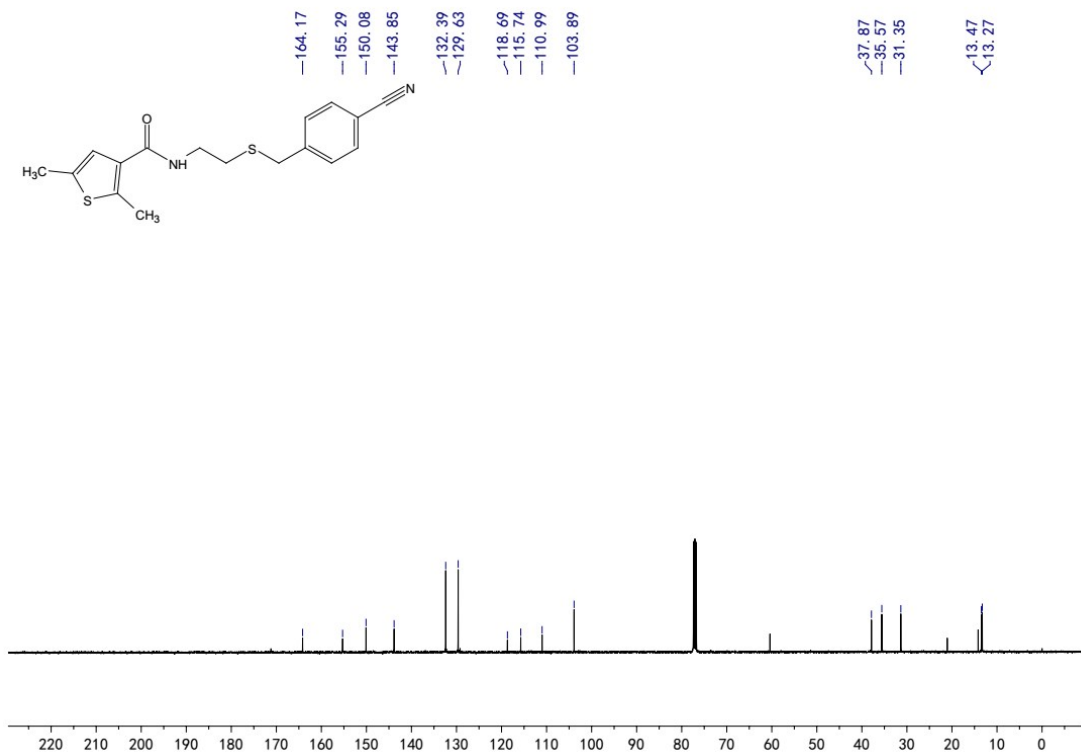

### $^1\text{H}$ NMR of compound **1u**

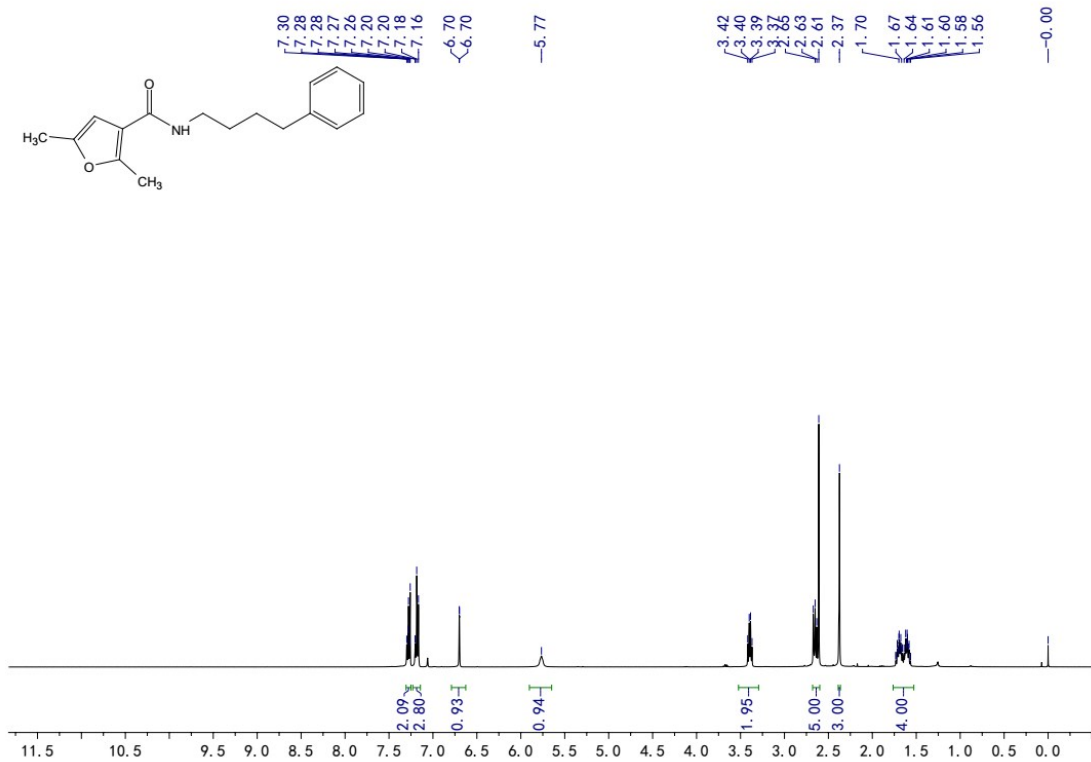

### $^{13}\text{C}$ NMR of compound **1u**

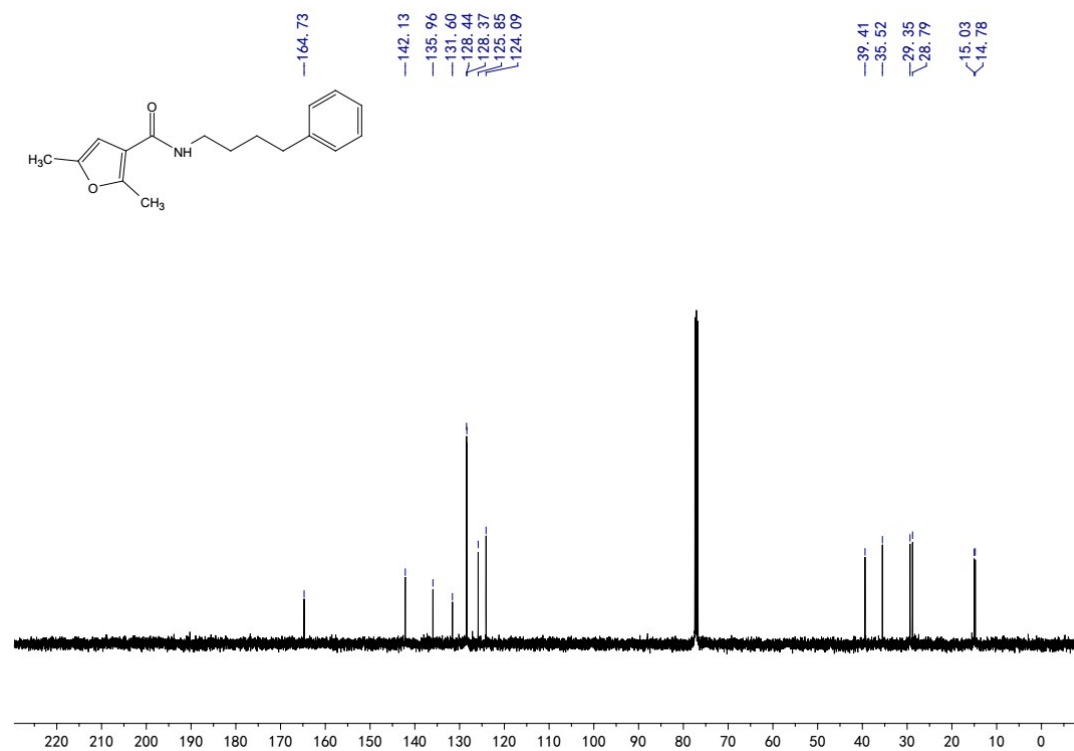

<sup>1</sup>H NMR of compound **1v**

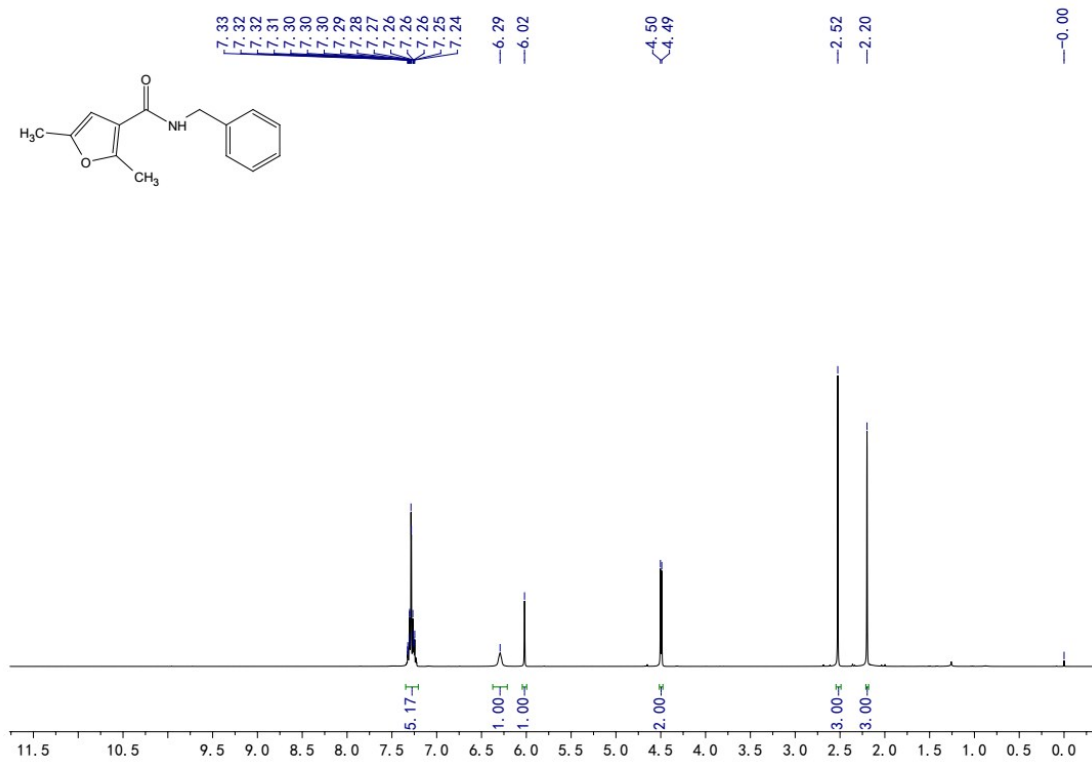

<sup>13</sup>C NMR of compound **1v**

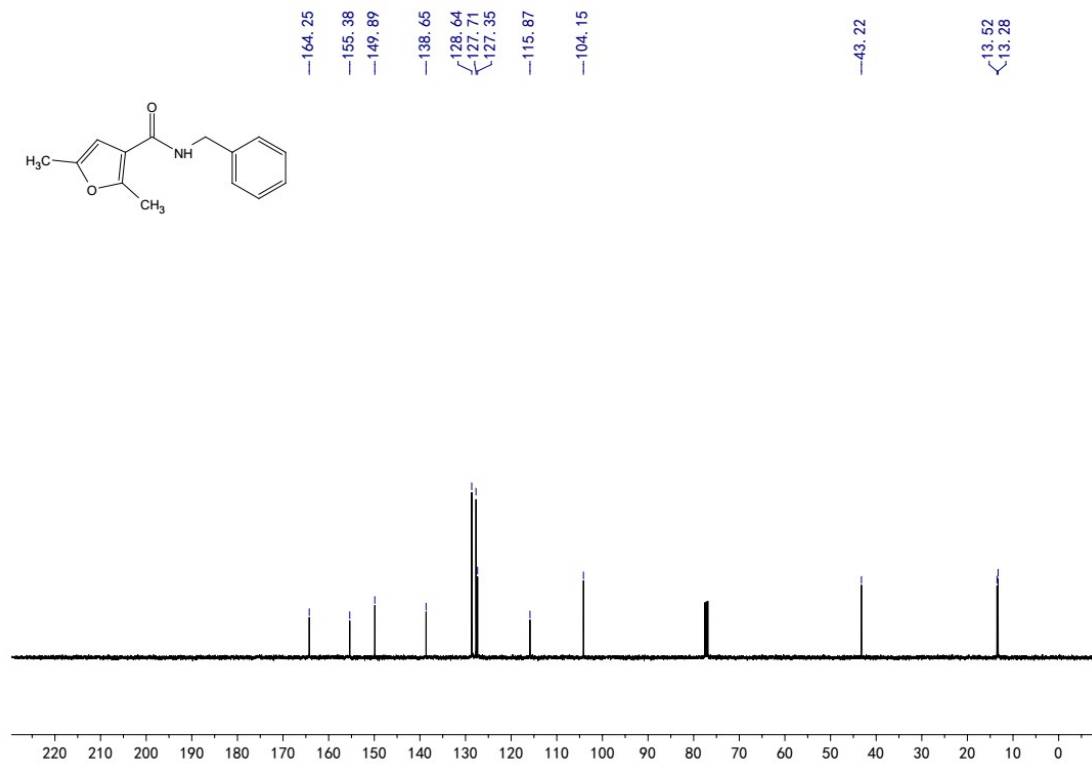

Supplement: c7ra00305f1.pdf [file c7ra00305f1.pdf]
